# Supplementary material for: Discovery of Bioactive Indole-Diketopiperazines from the Marine-Derived Fungus Penicillium brasilianum Aided by Genomic Information
Source: PubMed Central journal article supplement (PMC6781160; doi:10.3390/md17090514), 2019-09-01
Supplement: marinedrugs-17-00514-s001.pdf [file marinedrugs-17-00514-s001.pdf]

# Discovery of Bioactive Indole-Diketopiperazines from the Marine-Derived Fungus *Penicillium brasilianum* Aided by Genomic Information

Ya-Hui Zhang<sup>1,2,†</sup>, Ce Geng<sup>3,†</sup>, Xing-Wang Zhang<sup>3</sup>, Hua-Jie Zhu<sup>2</sup>, Chang-Lun Shao<sup>1,4</sup>, Fei Cao<sup>2\*</sup> and Chang-Yun Wang<sup>1,4,5\*</sup>

<sup>1</sup>Key Laboratory of Marine Drugs, the Ministry of Education of China, School of Medicine and Pharmacy, Ocean University of China, Qingdao 266003, P. R. China; 15689932652@163.com(Y.-H.Z.); shaochanglun@163.com(C.-L.S.); changyun@ouc.edu.cn(C.-Y.W.)

<sup>2</sup>College of Pharmaceutical Sciences, Key Laboratory of Pharmaceutical Quality Control of Hebei Province, Hebei University, Baoding 071002, P. R. China ;hjzhu2017@163.com(H.-J.Z); caofei542927001@163.com(F.C.)

<sup>3</sup>Shandong Provincial Key Laboratory of Synthetic Biology, CAS Key Laboratory of Biofuels at Qingdao Institute of Bioenergy and Bioprocess Technology, Chinese Academy of Sciences, Qingdao 266101, P. R. China; gengce@qibebt.ac.cn(C.G.); 735888678@qq.com(X.-W.Z.)

<sup>4</sup>Laboratory for Marine Drugs and Bioproducts, Qingdao National Laboratory for Marine Science and Technology, Qingdao 266237, People's Republic of China

<sup>5</sup>Institute of Evolution & Marine Biodiversity, Ocean University of China, Qingdao 266003, People's Republic of China.

†These authors contributed equally to this work.

\*Correspondence : caofei542927001@163.com (F.C.); changyun@ouc.edu.cn(C.-Y.W.)

## Supplementary Information

- Figure S1.**  $^1\text{H}$  NMR (500 MHz,  $\text{CDCl}_3$ ) spectrum of compound **1**.
- Figure S2.** Partial  $^1\text{H}$  NMR (500 MHz,  $\text{CDCl}_3$ ) spectrum of compound **1**.
- Figure S3.** Partial  $^1\text{H}$  NMR (500 MHz,  $\text{CDCl}_3$ ) spectrum of compound **1**.
- Figure S4.**  $^{13}\text{C}$  NMR (125 MHz,  $\text{CDCl}_3$ ) spectrum of compound **1**.
- Figure S5.** HSQC ( $\text{CDCl}_3$ ) spectrum of compound **1**.
- Figure S6.**  $^1\text{H}$ - $^1\text{H}$  COSY ( $\text{CDCl}_3$ ) spectrum of compound **1**.
- Figure S7.** HMBC ( $\text{CDCl}_3$ ) spectrum of compound **1**.
- Figure S8.** NOESY ( $\text{CDCl}_3$ ) spectrum of compound **1**.
- Figure S9.** HRESIMS spectrum of compound **1**.
- Figure S10.**  $^1\text{H}$  NMR (500 MHz,  $\text{CDCl}_3$ ) spectrum of compound **2**.
- Figure S11.**  $^{13}\text{C}$  NMR (125 MHz,  $\text{CDCl}_3$ ) spectrum of compound **2**.
- Figure S12.** Partial  $^{13}\text{C}$  NMR (125 MHz,  $\text{CDCl}_3$ ) spectrum of compound **2**.
- Figure S13.** HSQC ( $\text{CDCl}_3$ ) spectrum of compound **2**.
- Figure S14.**  $^1\text{H}$ - $^1\text{H}$  COSY ( $\text{CDCl}_3$ ) spectrum of compound **2**.
- Figure S15.** HMBC ( $\text{CDCl}_3$ ) spectrum of compound **2**.
- Figure S16.** NOESY ( $\text{CDCl}_3$ ) spectrum of compound **2**.
- Figure S17.** HRESIMS spectrum of compound **2**.
- Figure S18.**  $^1\text{H}$  NMR (500 MHz,  $\text{CDCl}_3$ ) spectrum of compound **3**
- Figure S19.** Partial  $^1\text{H}$  NMR (500 MHz,  $\text{CDCl}_3$ ) spectrum of compound **3**.
- Figure S20.** Partial  $^1\text{H}$  NMR (500 MHz,  $\text{CDCl}_3$ ) spectrum of compound **3**.
- Figure S21.**  $^{13}\text{C}$  NMR (125 MHz,  $\text{CDCl}_3$ ) spectrum of compound **3**
- Figure S22.** Partial  $^{13}\text{C}$  NMR (125 MHz,  $\text{CDCl}_3$ ) spectrum of compound **3**.
- Figure S23.** HSQC ( $\text{CDCl}_3$ ) spectrum of compound **3**.
- Figure S24.**  $^1\text{H}$ - $^1\text{H}$  COSY ( $\text{CDCl}_3$ ) spectrum of compound **3**.
- Figure S25.** HMBC ( $\text{CDCl}_3$ ) spectrum of compound **3**.
- Figure S26.** NOESY ( $\text{CDCl}_3$ ) spectrum of compound **3**.
- Figure S27.** HRESIMS spectrum of compound **3**.
- Figure S28.**  $^1\text{H}$  NMR (600 MHz,  $\text{CDCl}_3$ ) spectrum of compound **4**.
- Figure S29.**  $^{13}\text{C}$  NMR (150 MHz,  $\text{CDCl}_3$ ) spectrum of compound **4**.
- Figure S30.** ESIMS spectrum of compound **4**.
- Figure S31.**  $^1\text{H}$  NMR (500 MHz,  $\text{CDCl}_3$ ) spectrum of compound **5**.
- Figure S32.**  $^{13}\text{C}$  NMR (125 MHz,  $\text{CDCl}_3$ ) spectrum of compound **5**.
- Figure S33.** ESIMS spectrum of compound **5**.
- Figure S34.**  $^1\text{H}$  NMR (600 MHz,  $\text{CDCl}_3$ ) spectrum of compound **6**.
- Figure S35.**  $^{13}\text{C}$  NMR (150 MHz,  $\text{CDCl}_3$ ) spectrum of compound **6**.
- Figure S36.** ESIMS spectrum of compound **6**.

**Figure S37.**  $^1\text{H}$  NMR (500 MHz,  $\text{CDCl}_3$ ) spectrum of compound **7**.

**Figure S38.**  $^{13}\text{C}$  NMR (125 MHz,  $\text{CDCl}_3$ ) spectrum of compound **7**.

**Figure S39.** ESIMS spectrum of compound **7**.

**Figure S40.**  $^1\text{H}$  NMR (600 MHz,  $\text{DMSO-}d_6$ ) spectrum of compound **8**.

**Figure S41.**  $^{13}\text{C}$  NMR (150 MHz,  $\text{DMSO-}d_6$ ) spectrum of compound **8**.

**Figure S42.** ESIMS spectrum of compound **8**.

**Figure S43.** UV spectra of compounds **1–3**.

**Figure S44.** HPLC at 254 nm of the fermentation extracts from cultures in different media.

**Figure S45.** Comparison of our compounds BGC with fumitremorgin BGC

**Table S1.** Proposed NRPS biosynthetic gene clusters (NRPS-BGCs) predicted by fungiSMASH.

**Table S2.** Proposed functions of genes in *ctp* gene clusters.

**Table S3.** The coordinate for the lowest-energy conformer [(2*S*,8*S*,9*R*,12*R*,18*S*)-**1**] in ECD calculation.

**Table S4.** The coordinate for the lowest-energy conformer [(8*S*,9*S*,12*R*,18*S*)-**2**] in ECD calculation.

**Table S5.** Antibacterial activities data of compounds **1–8**.

**Table S6.** Cytotoxic activity data of compounds **1–8**.

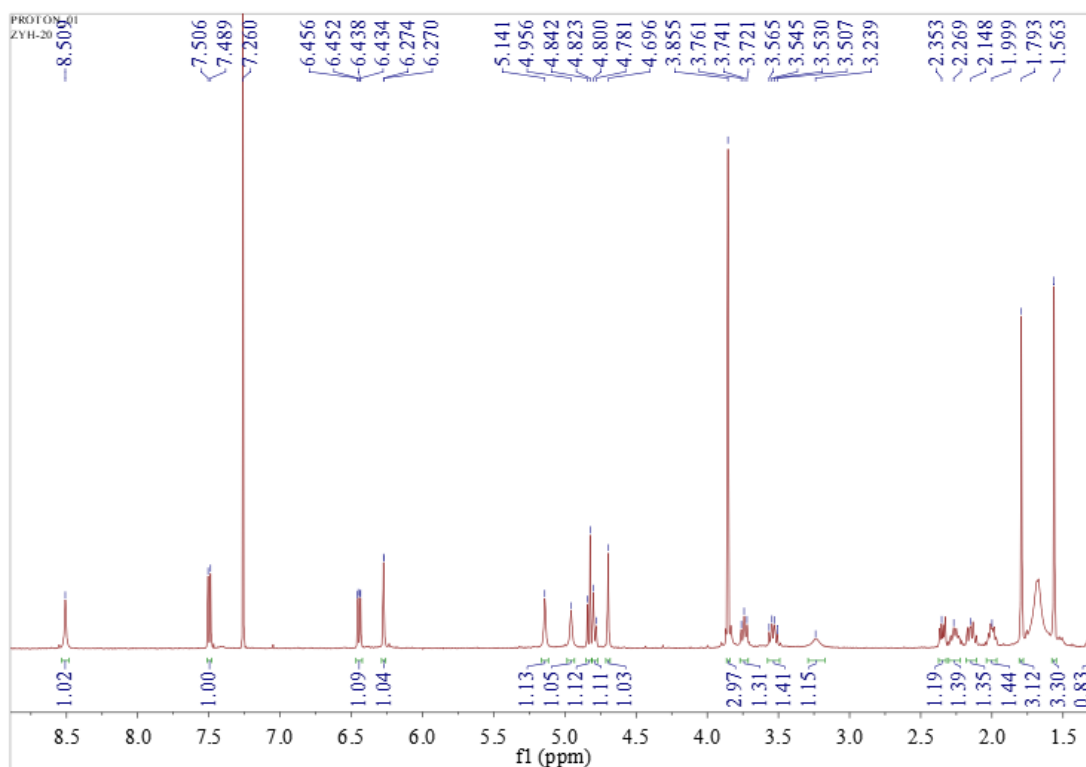

**Figure S1.**  $^1\text{H}$  NMR (500 MHz,  $\text{CDCl}_3$ ) spectrum of compound **1**.

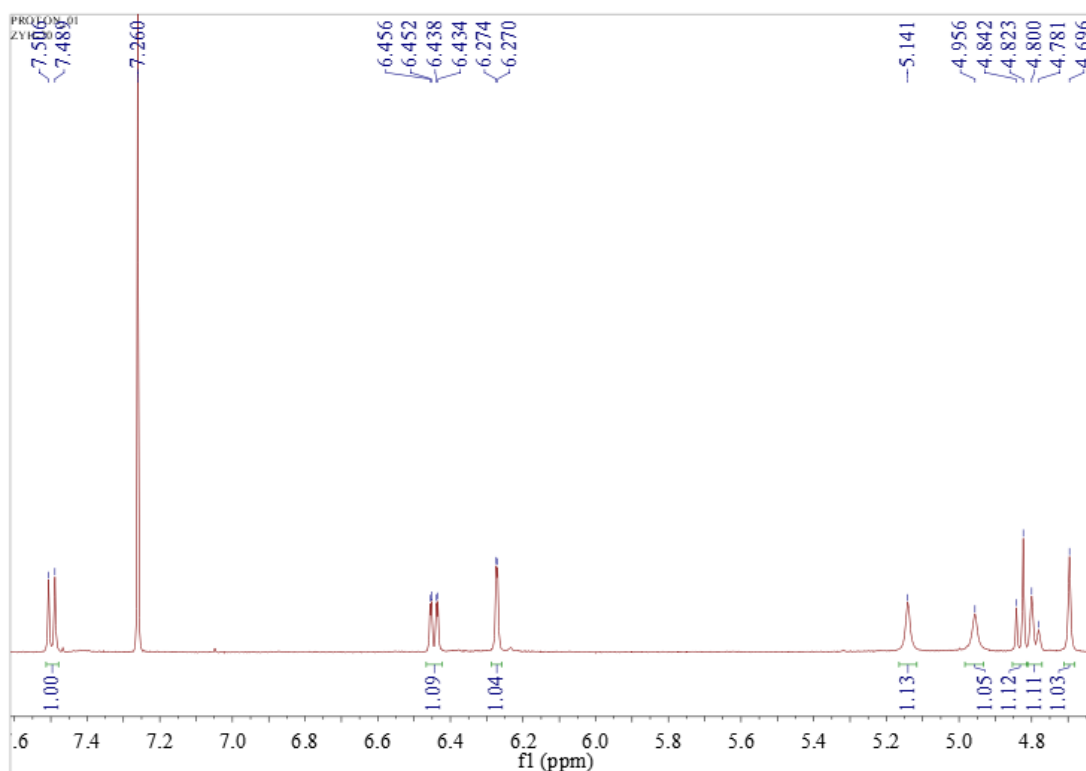

**Figure S2.** Partial  $^1\text{H}$  NMR (500 MHz,  $\text{CDCl}_3$ ) spectrum of compound **1**.

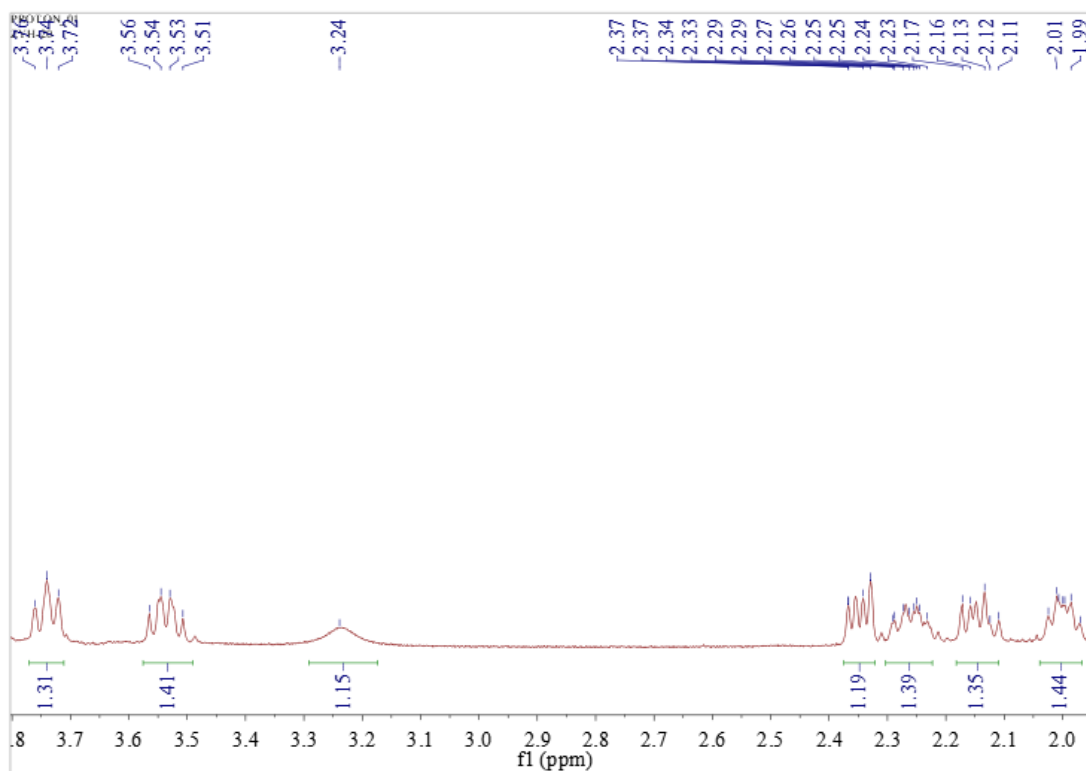

**Figure S3.** Partial  $^1\text{H}$  NMR (500 MHz,  $\text{CDCl}_3$ ) spectrum of compound **1**

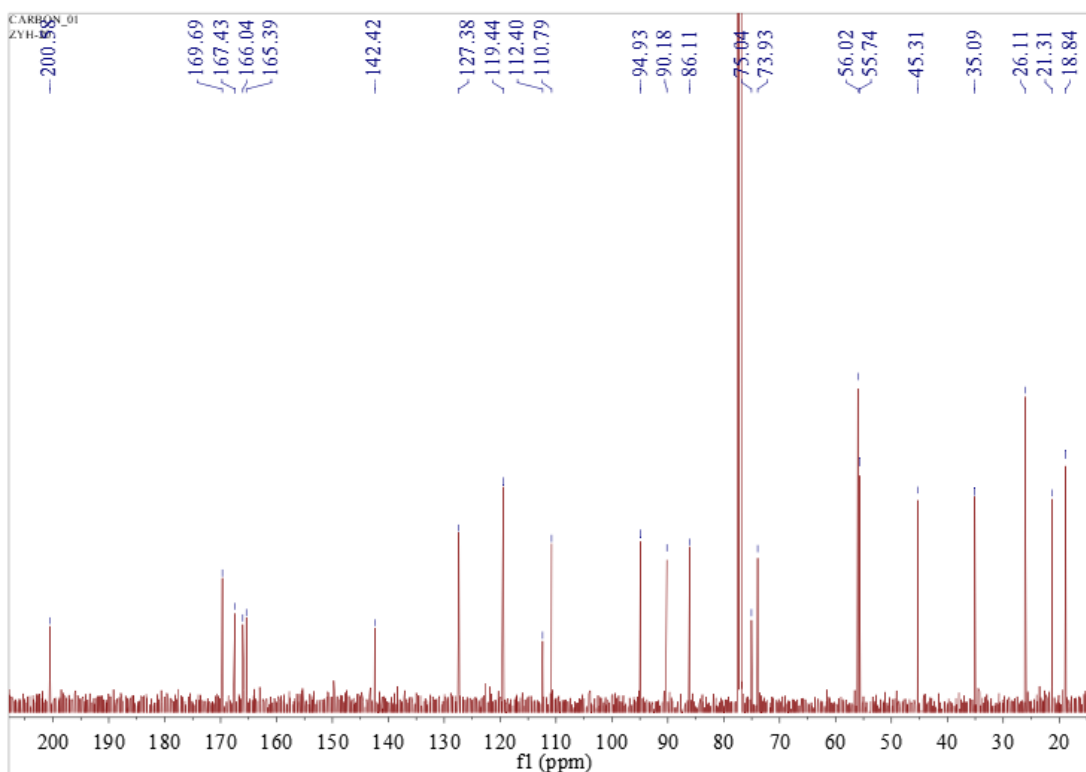

**Figure S4.**  $^{13}\text{C}$  NMR (125 MHz,  $\text{CDCl}_3$ ) spectrum of compound **1**.

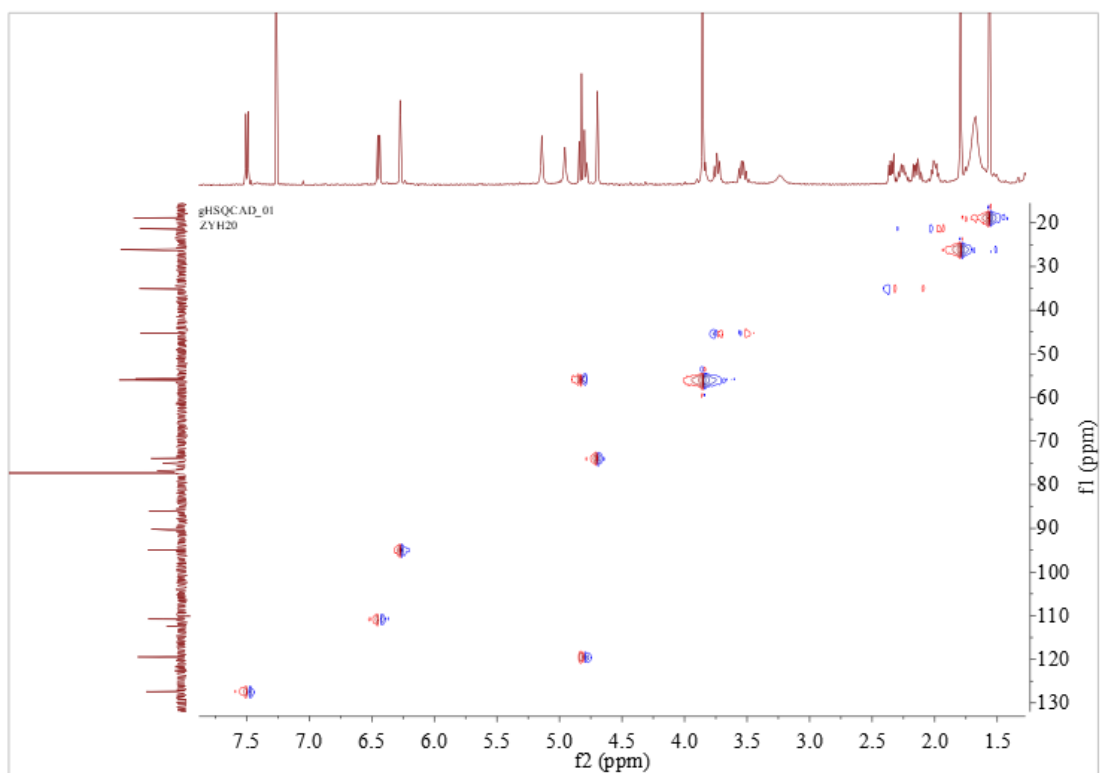

**Figure S5.** HSQC (CDCl<sub>3</sub>) spectrum of compound **1**.

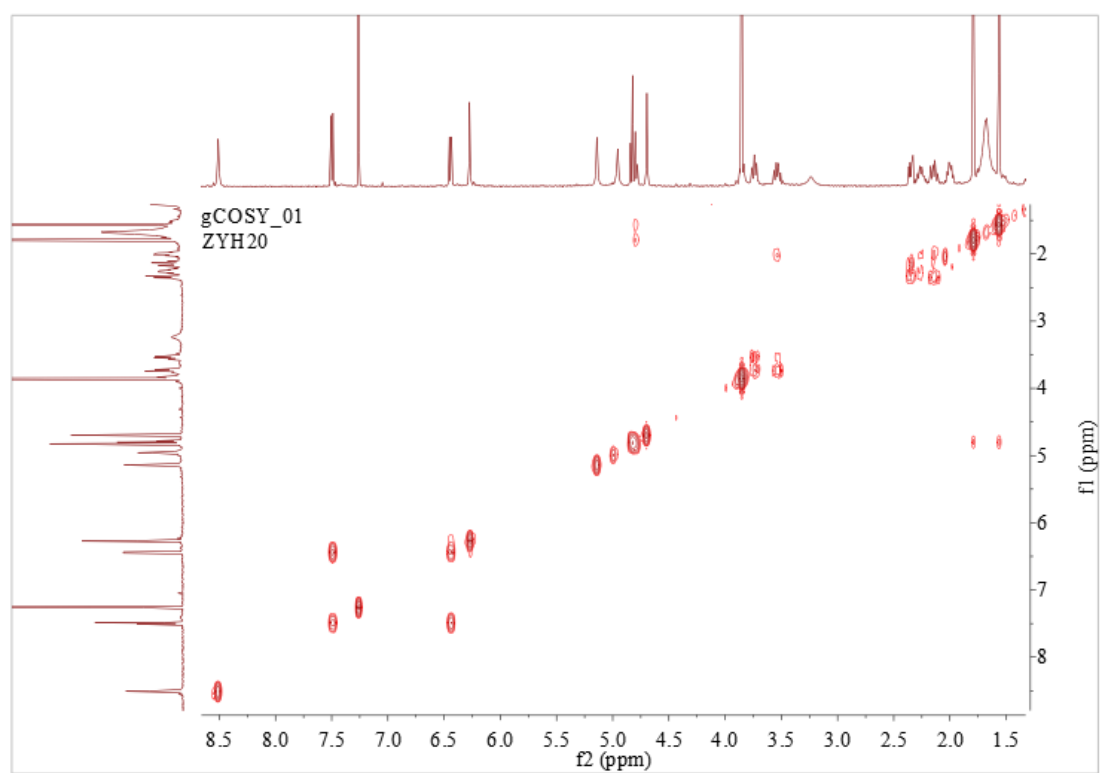

**Figure S6.** COSY (CDCl<sub>3</sub>) spectrum of compound **1**.

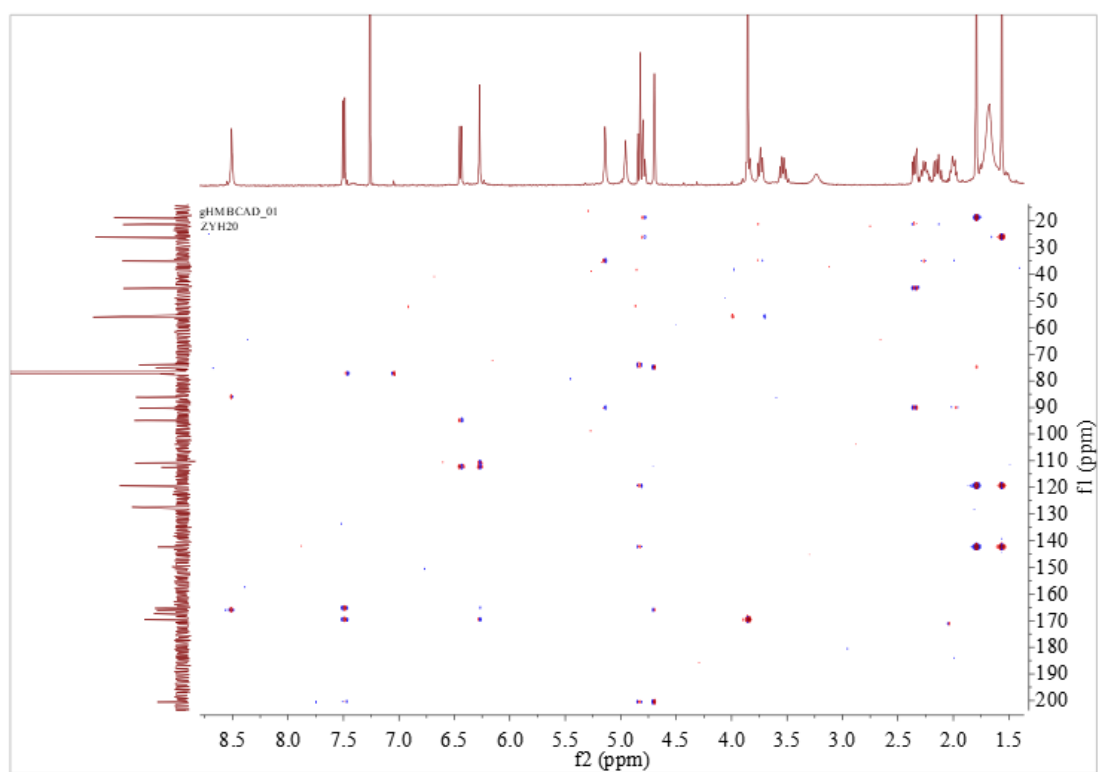

**Figure S7.** HMBC (CDCl<sub>3</sub>) spectrum of compound **1**.

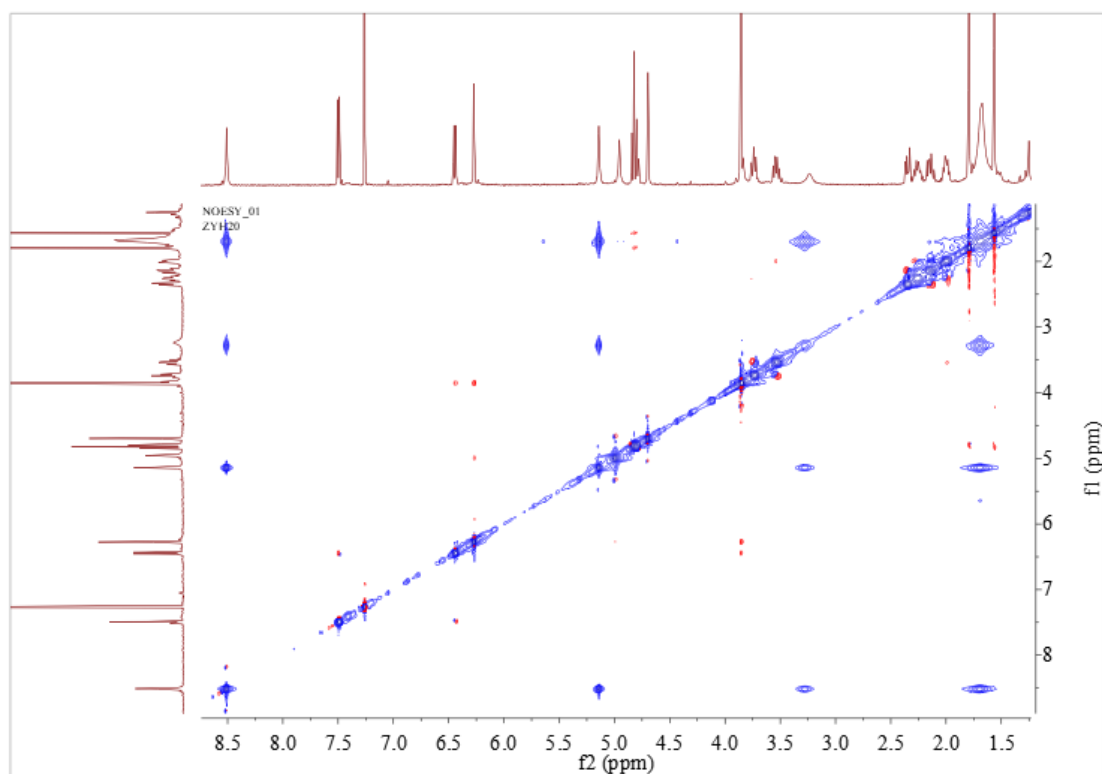

**Figure S8.** NOESY (CDCl<sub>3</sub>) spectrum of compound **1**.

20180326-ZYH-20\_180326093704 #56 RT: 0.45 AV: 1 NL: 2.46E6  
T: FTMS + p ESI Full ms [100.00-2000.00]

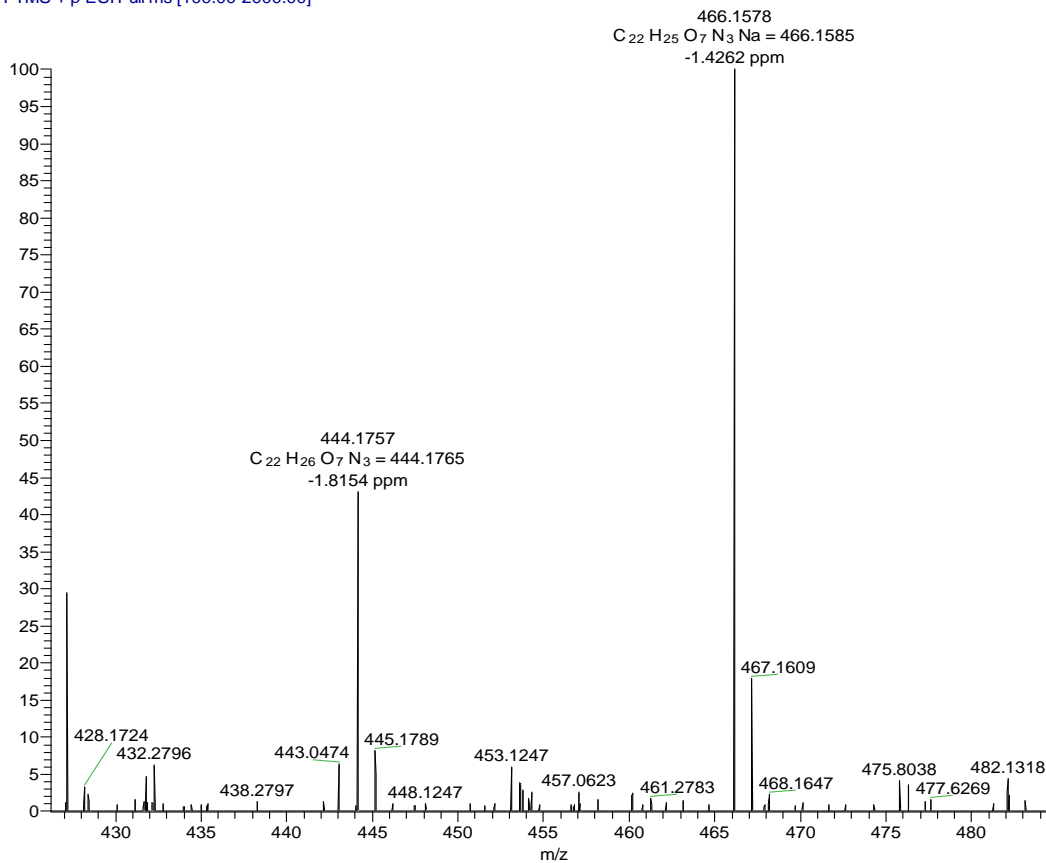

Figure S9. HRESIMS spectrum of compound 1.

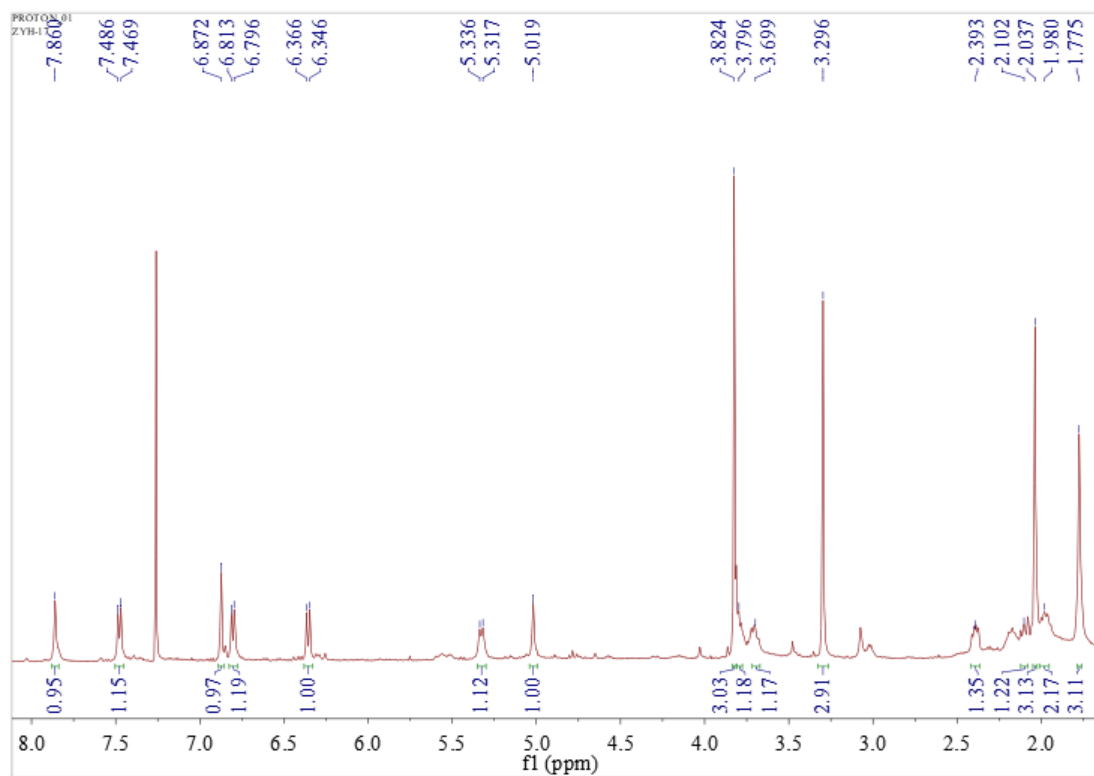

Figure S10. <sup>1</sup>H NMR (500 MHz, CDCl<sub>3</sub>) spectrum of compound 2.



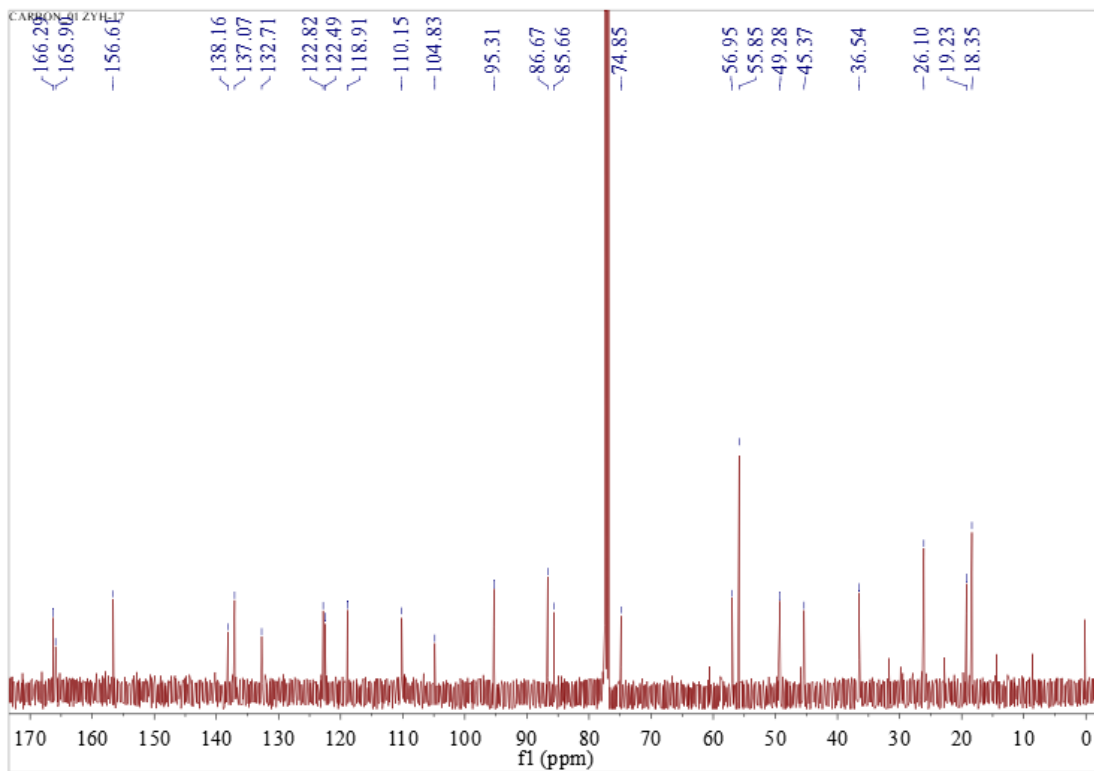

**Figure S11.**  $^{13}\text{C}$  NMR (125 MHz,  $\text{CDCl}_3$ ) spectrum of compound **2**.

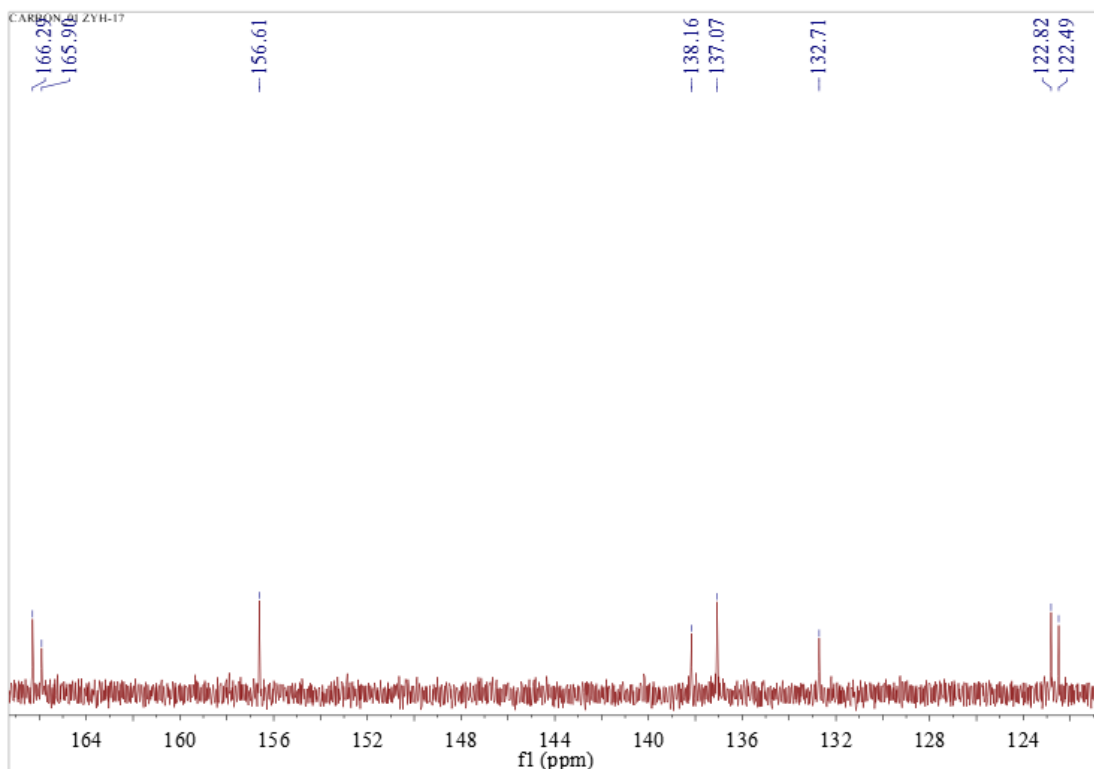

**Figure S12.** Partial  $^{13}\text{C}$  NMR (125 MHz,  $\text{CDCl}_3$ ) spectrum of compound **2**.

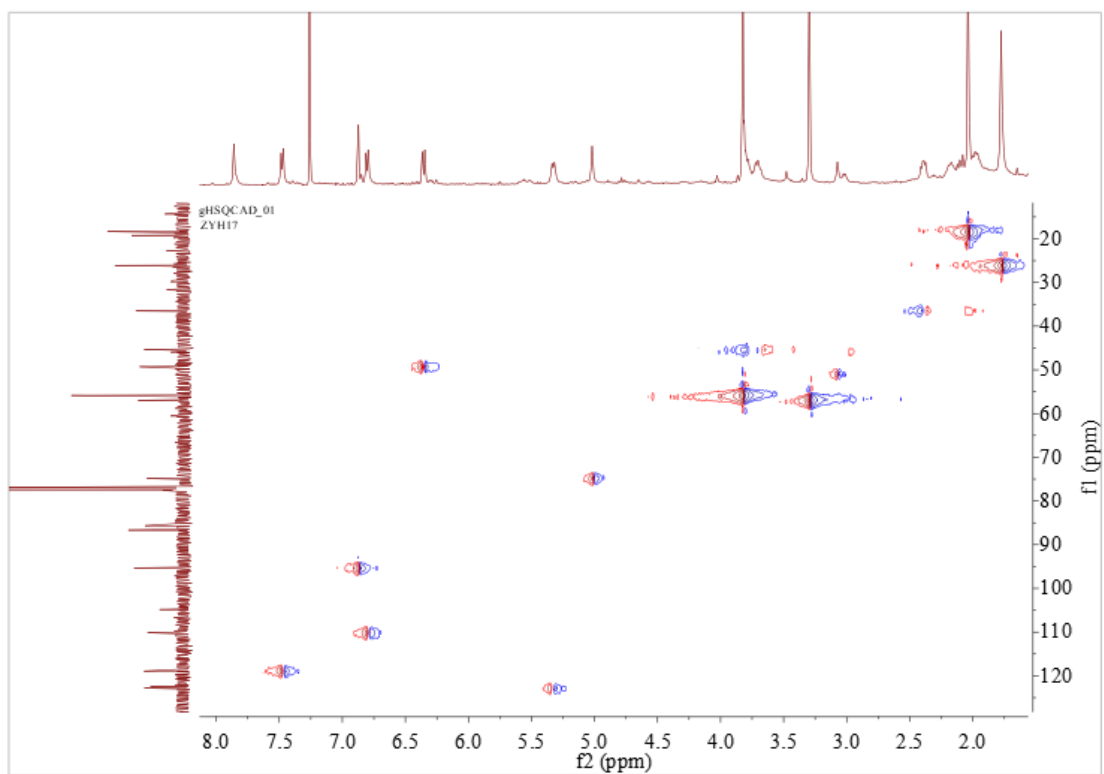

**Figure S13.** HSQC (CDCl<sub>3</sub>) spectrum of compound **2**.

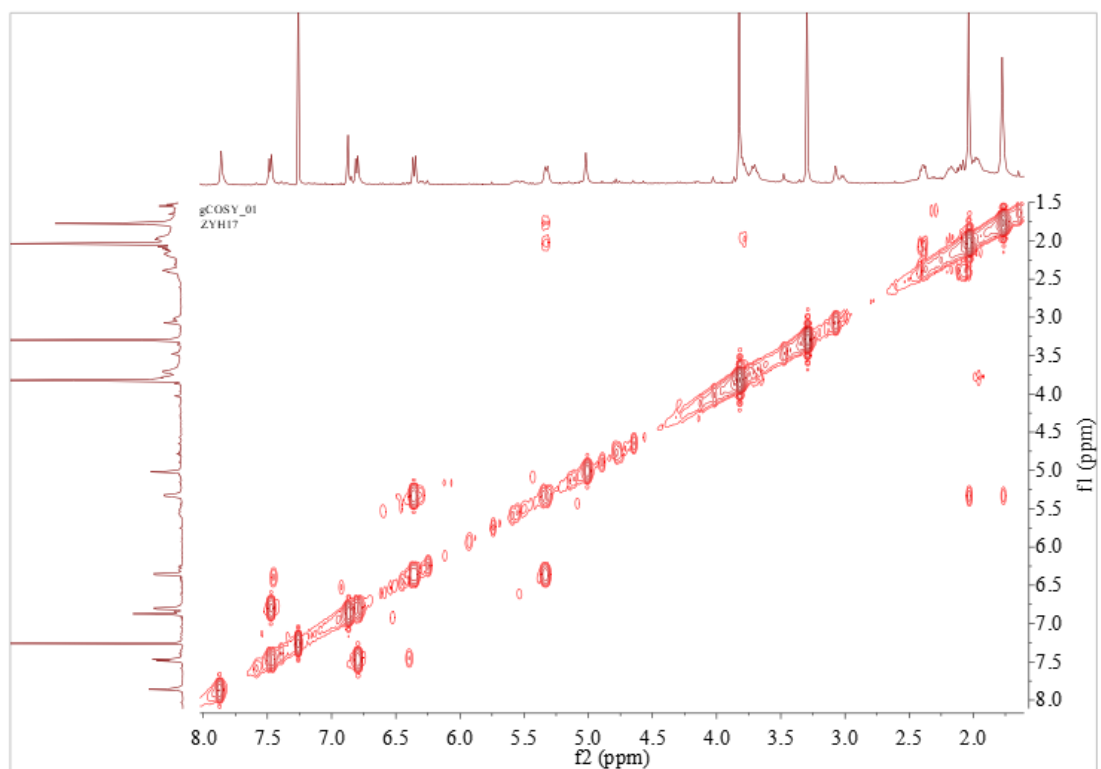

**Figure S14.** COSY (CDCl<sub>3</sub>) spectrum of compound **2**.

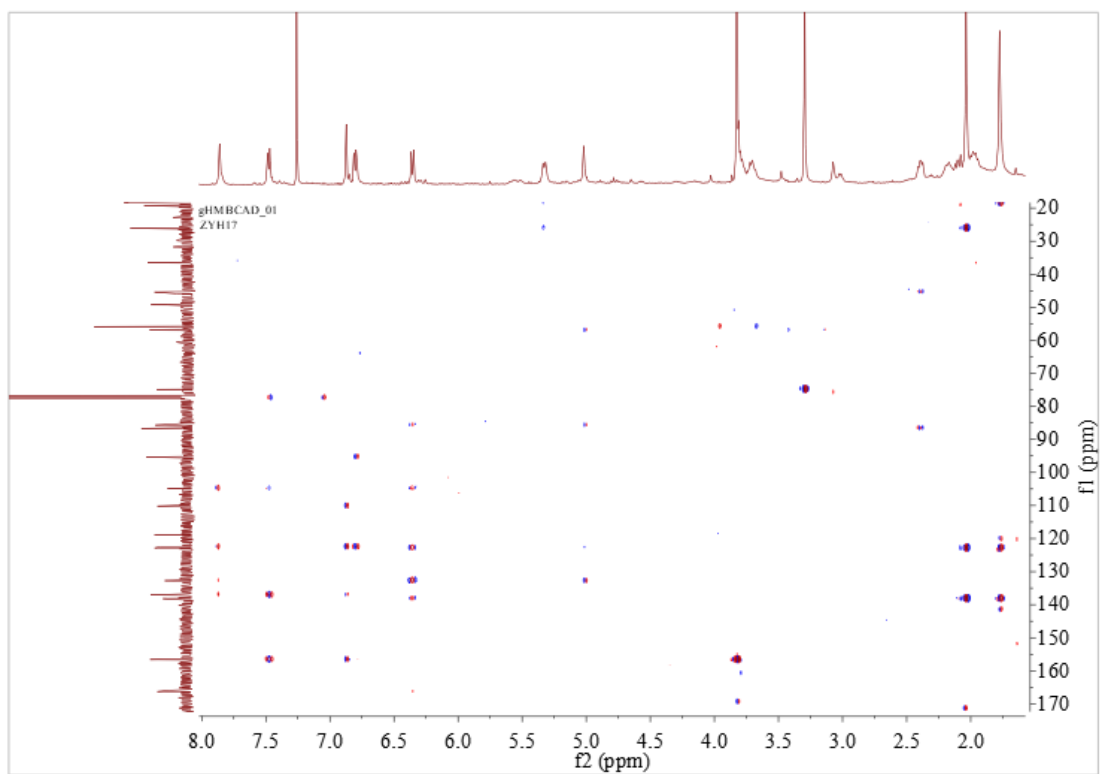

**Figure S15.** HMBC (CDCl<sub>3</sub>) spectrum of compound **2**.

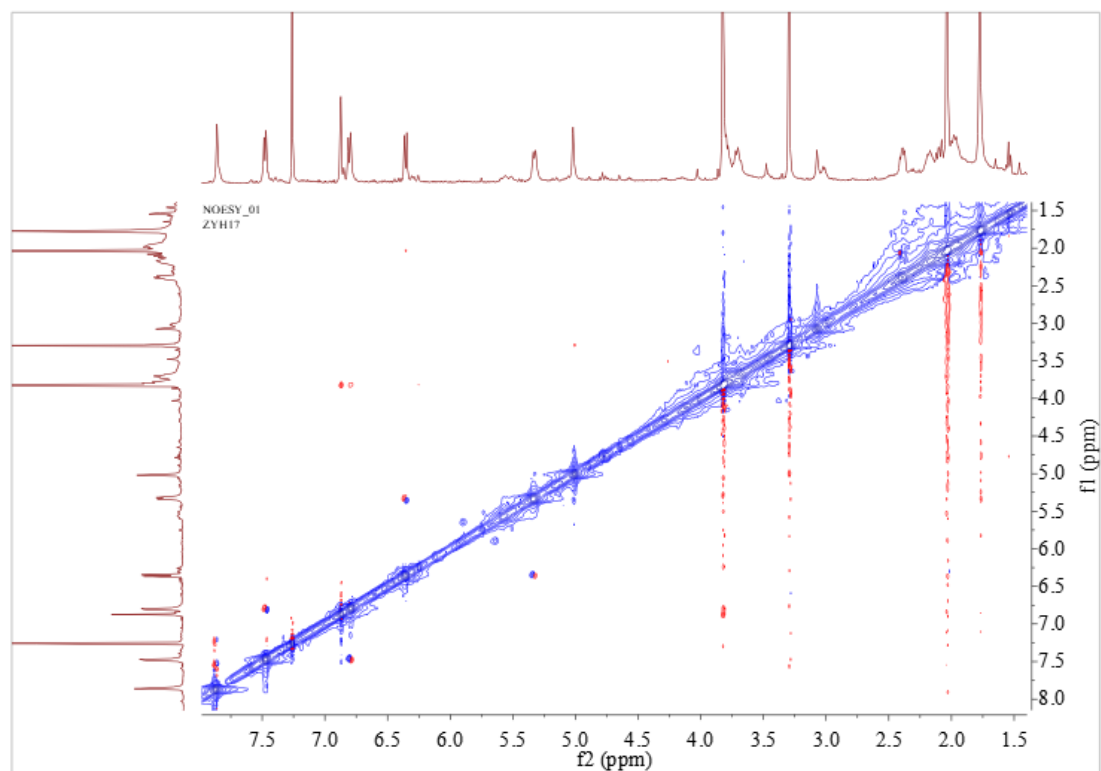

**Figure S16.** NOESY (CDCl<sub>3</sub>) spectrum of compound **2**.

20180418-ZYH-17\_180418090128 #48 RT: 0.48 AV: 1 NL: 4.74E6  
T: FTMS - p ESI Full ms [100.00-2000.00]

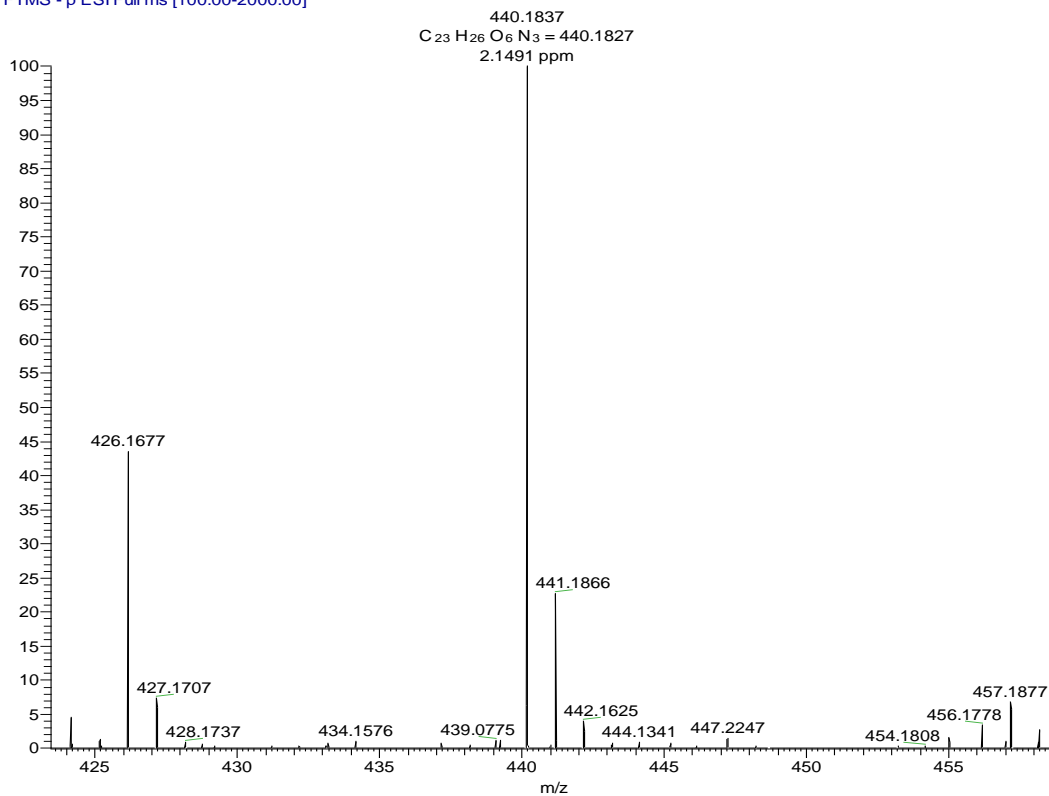

Figure S17. HRESIMS spectrum of compound 2.

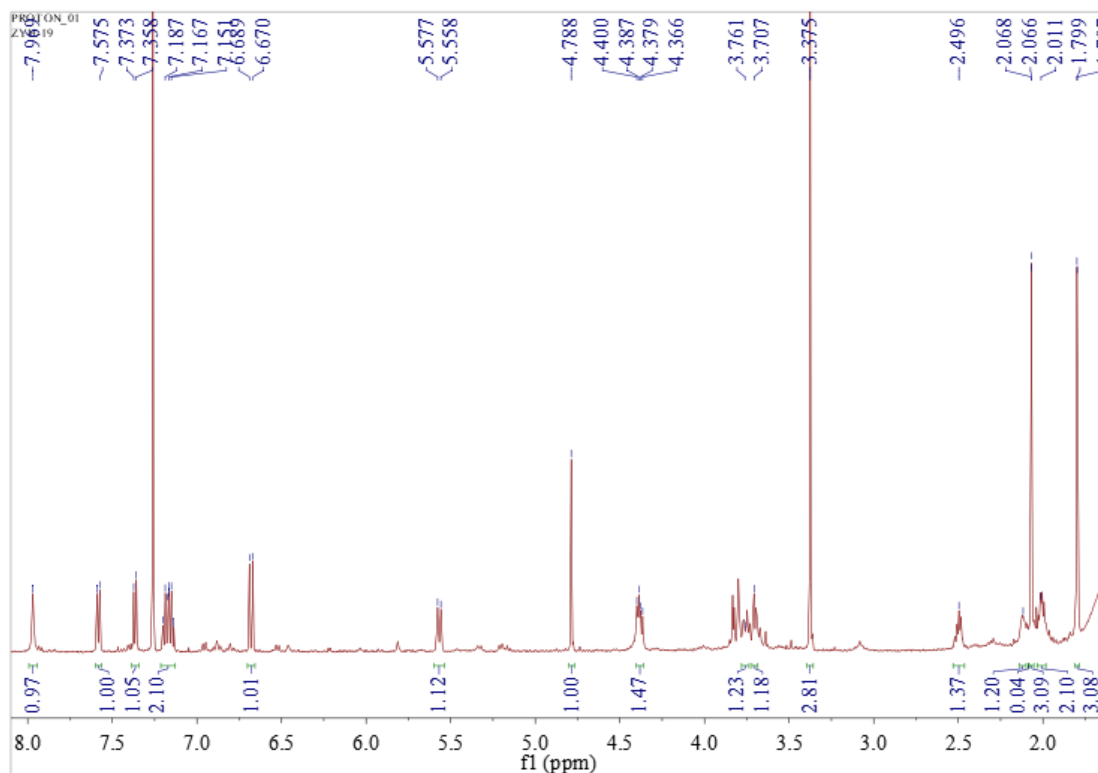

Figure S18. <sup>1</sup>H NMR (500 MHz, CDCl<sub>3</sub>) spectrum of compound 3

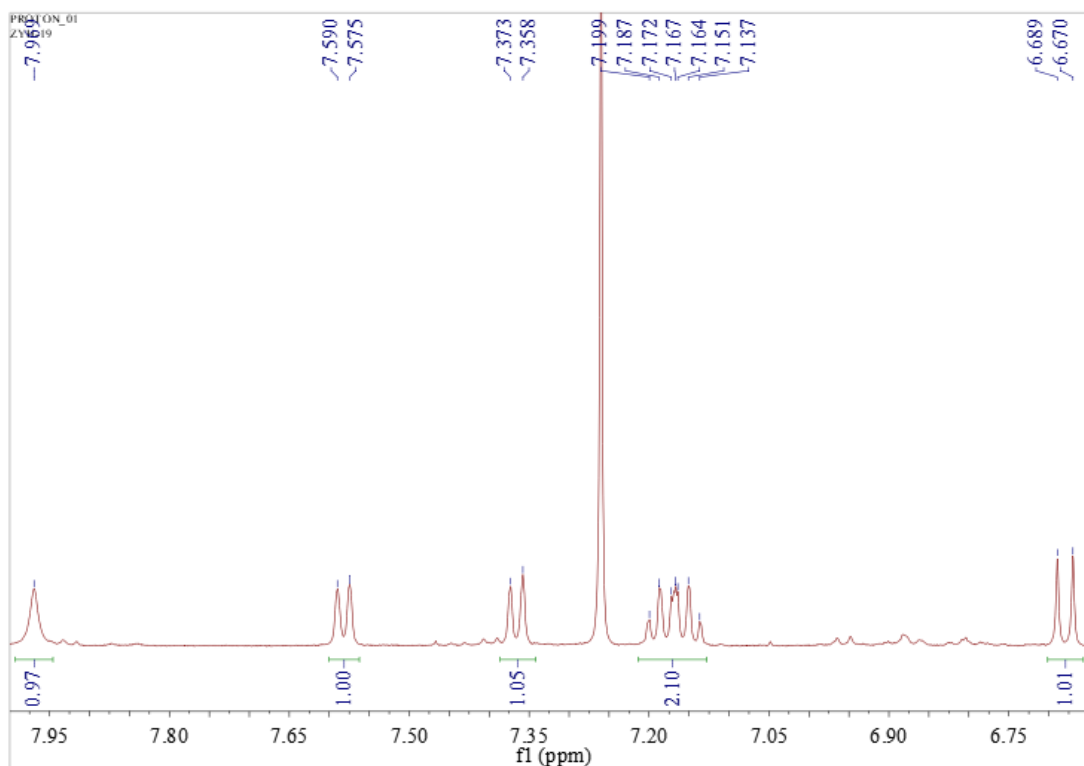

**Figure S19.** Partial <sup>1</sup>H NMR (500 MHz, CDCl<sub>3</sub>) spectrum of compound **3**.

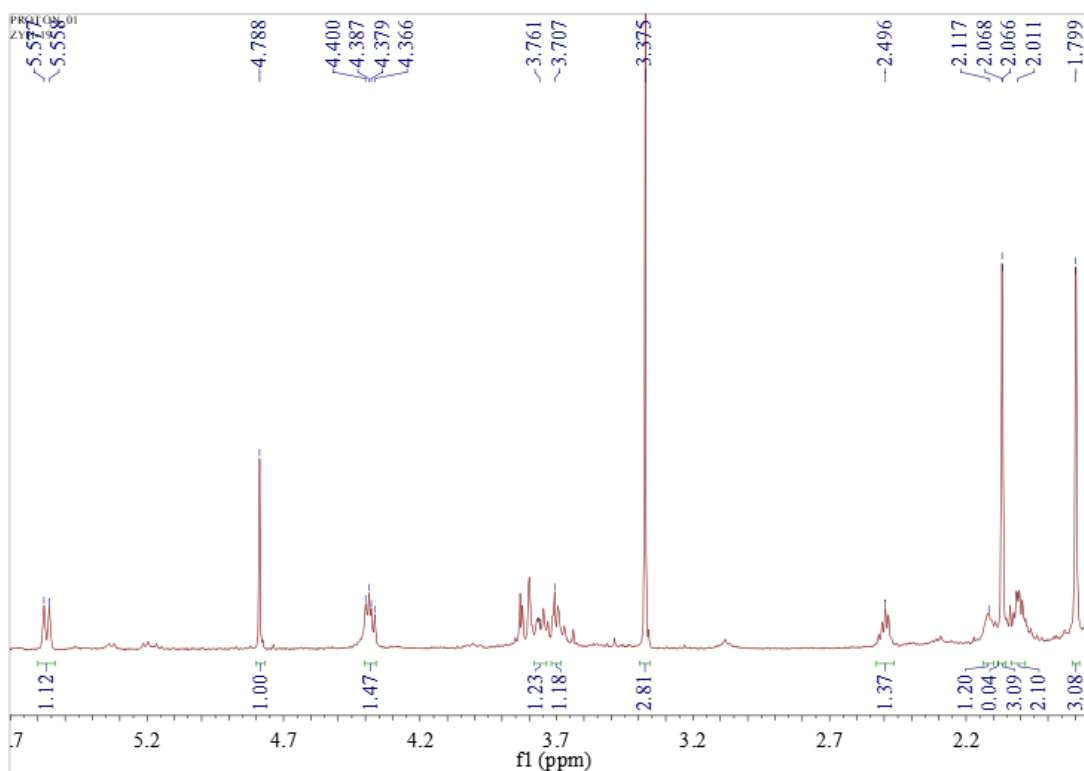

**Figure S20.** Partial <sup>1</sup>H NMR (500 MHz, CDCl<sub>3</sub>) spectrum of compound **3**.

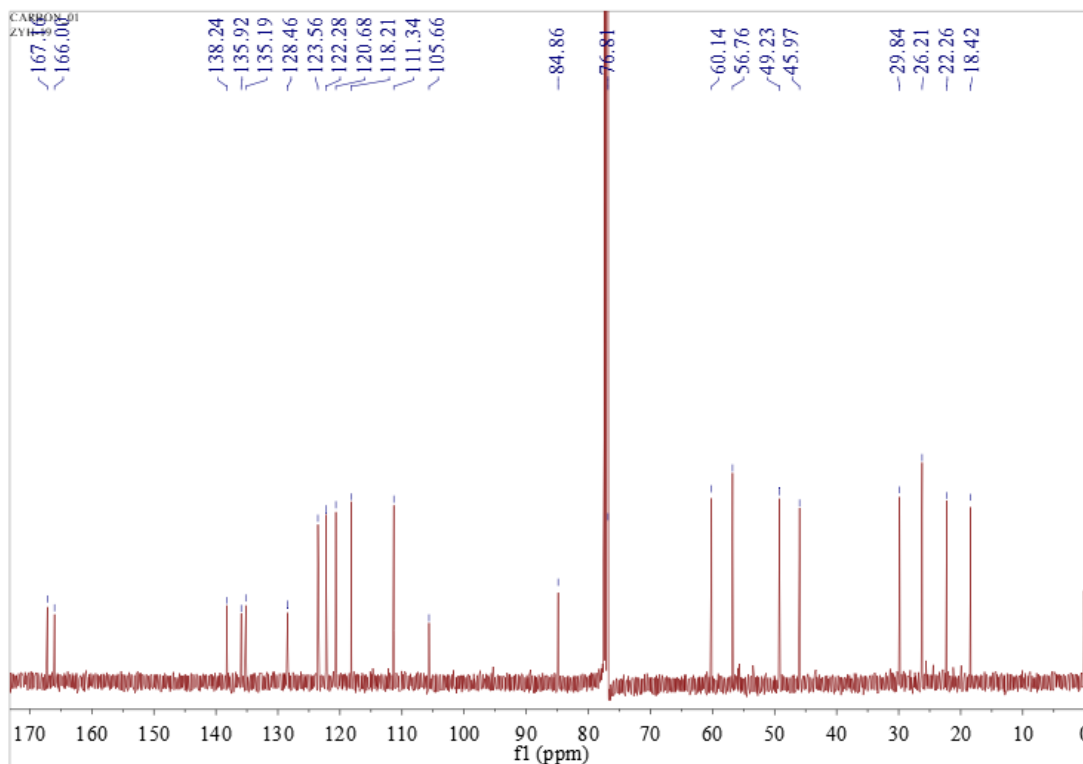

**Figure S21.**  $^{13}\text{C}$  NMR (125 MHz,  $\text{CDCl}_3$ ) spectrum of compound **3**

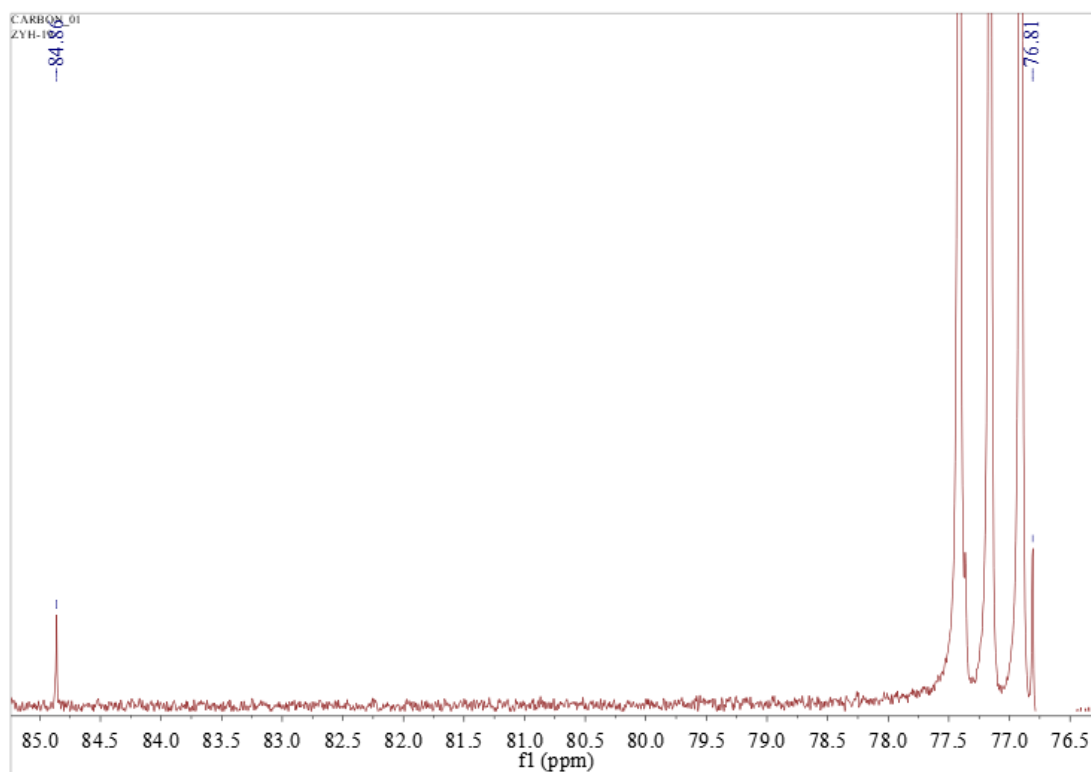

**Figure S22.** Partial  $^{13}\text{C}$  NMR (125 MHz,  $\text{CDCl}_3$ ) spectrum of compound **3**.

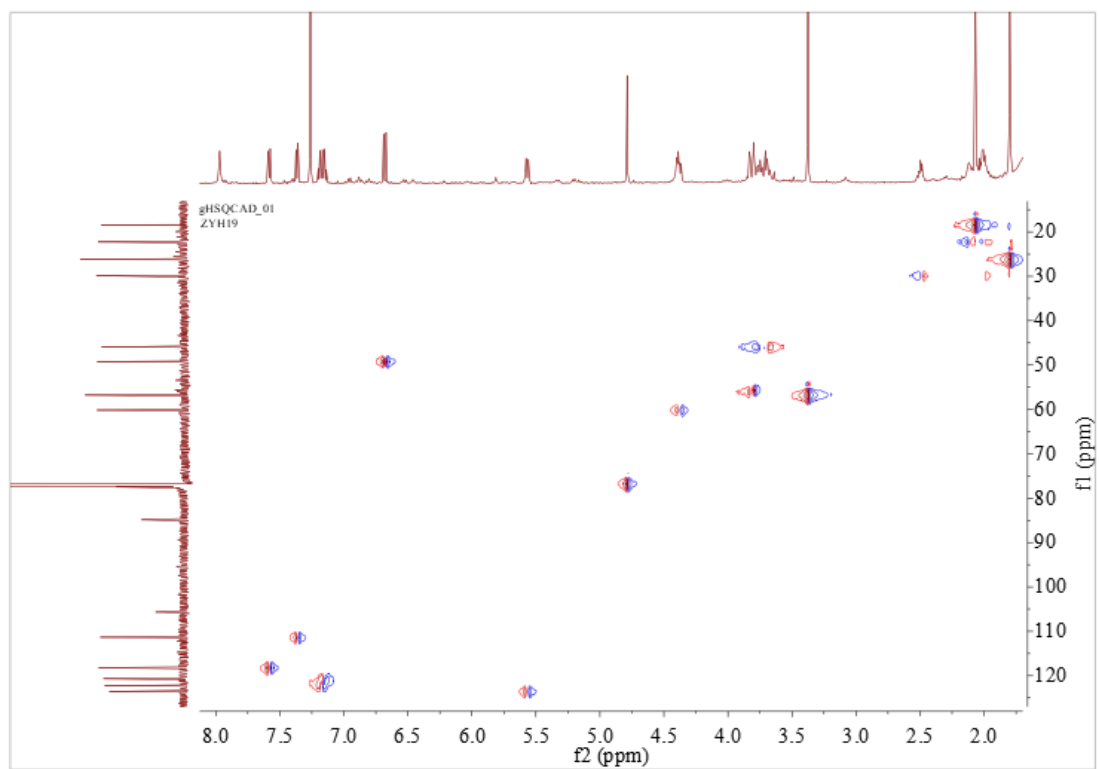

**Figure S23.** HSQC (CDCl<sub>3</sub>) spectrum of compound **3**.

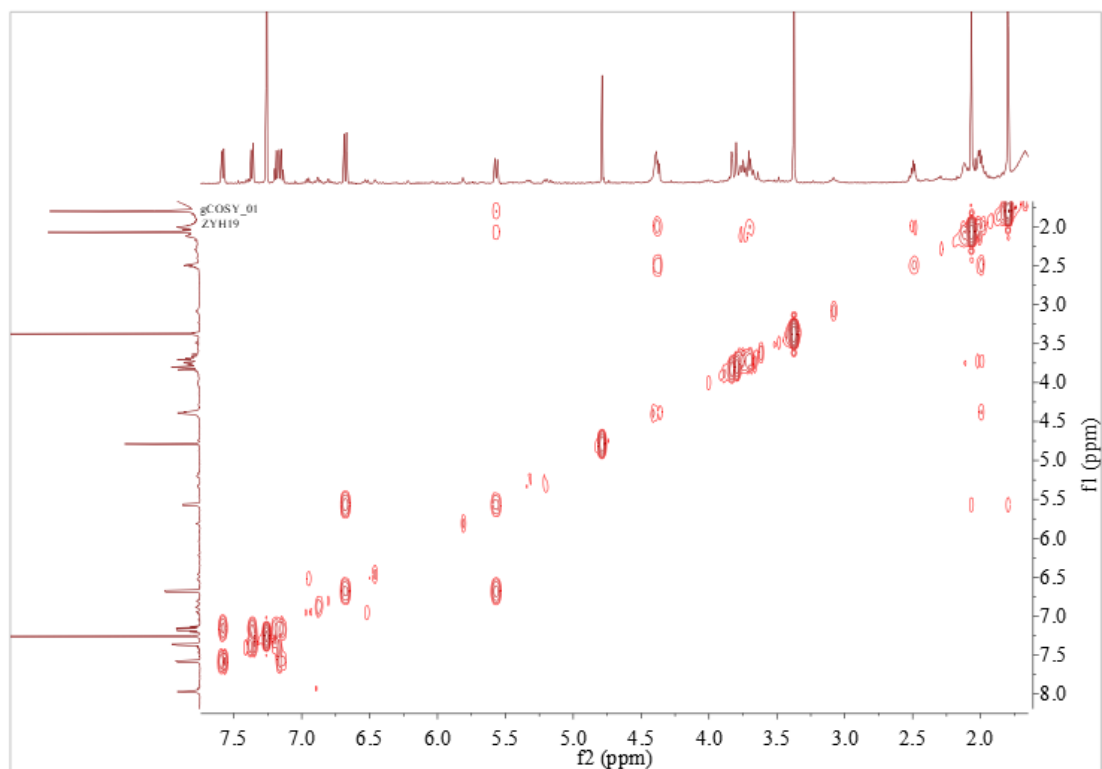

**Figure S24.** COSY (CDCl<sub>3</sub>) spectrum of compound **3**.

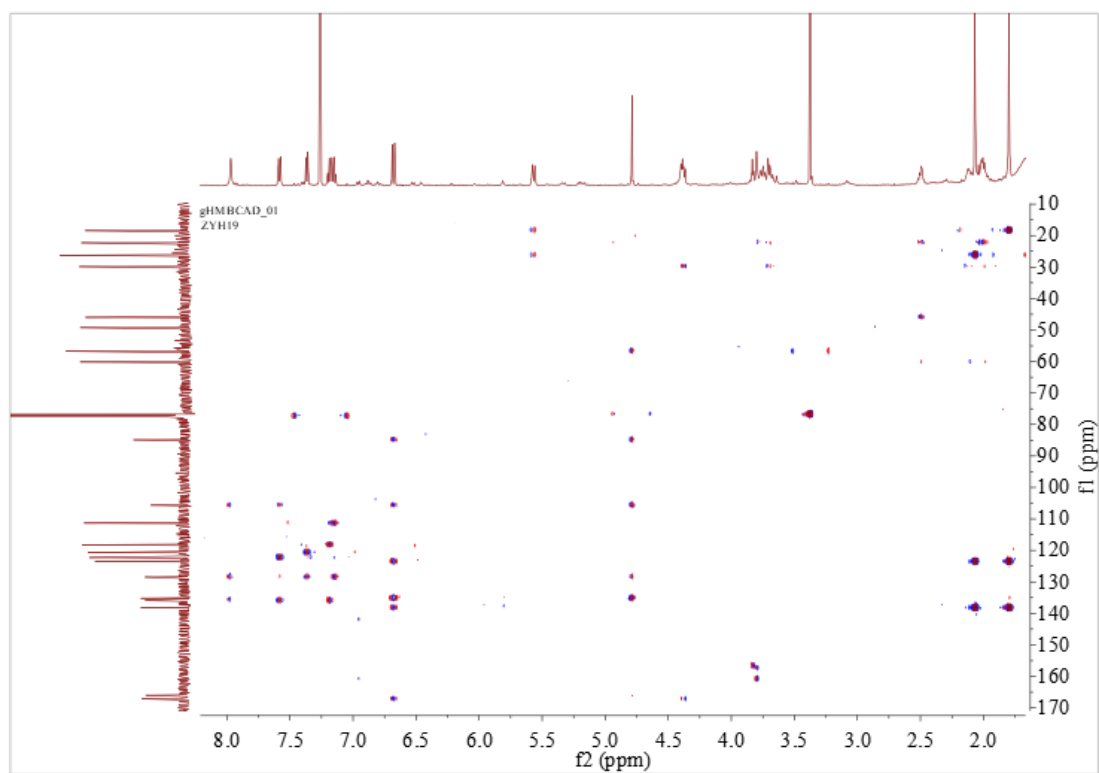

**Figure S25.** HMBC (CDCl<sub>3</sub>) spectrum of compound **3**.

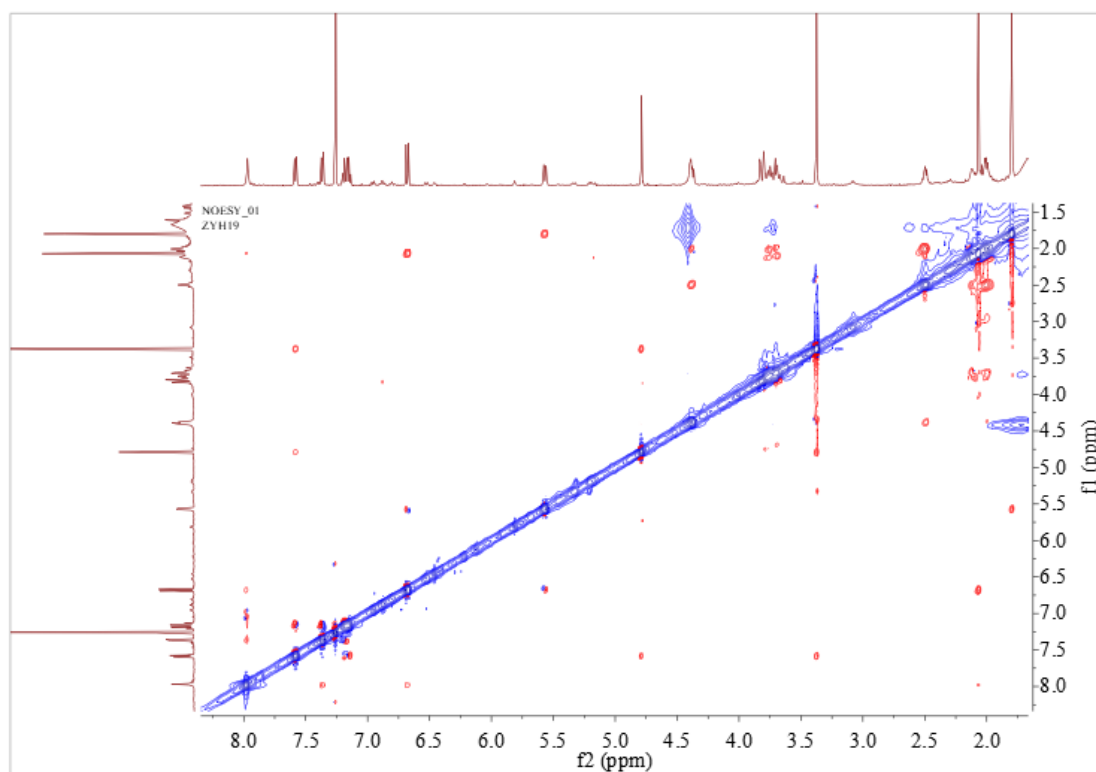

**Figure S26.** NOESY (CDCl<sub>3</sub>) spectrum of compound **3**.



20180402-ZYH-19\_180402095315 #64 RT: 0.51 AV: 1 NL: 1.94E7  
T: FTMS + p ESI Full ms [150.00-2000.00]

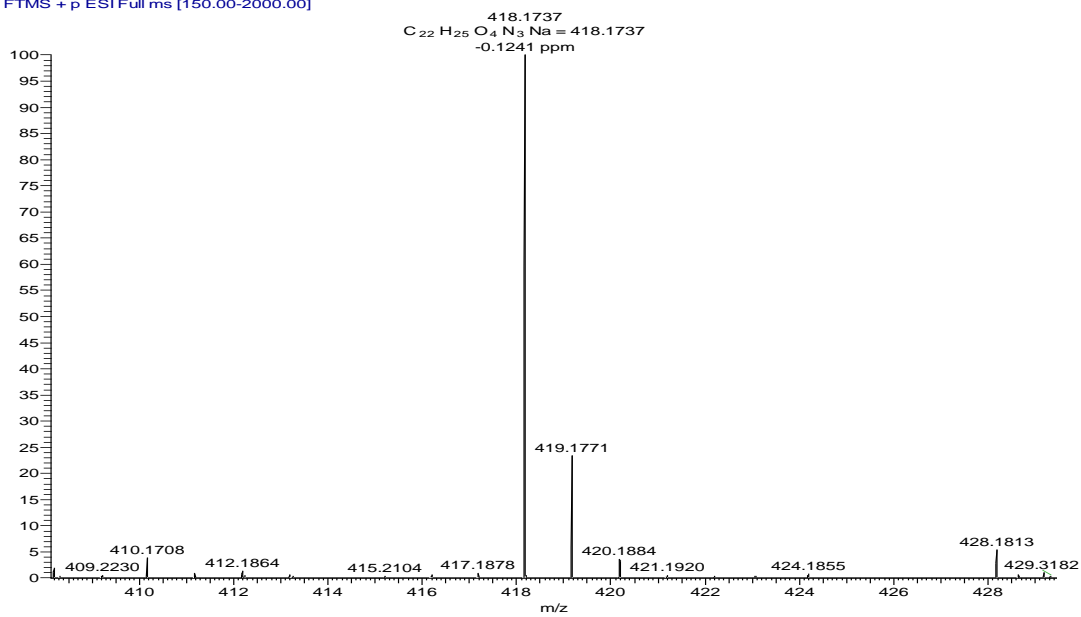

Figure S27. HRESIMS spectrum of compound 3.

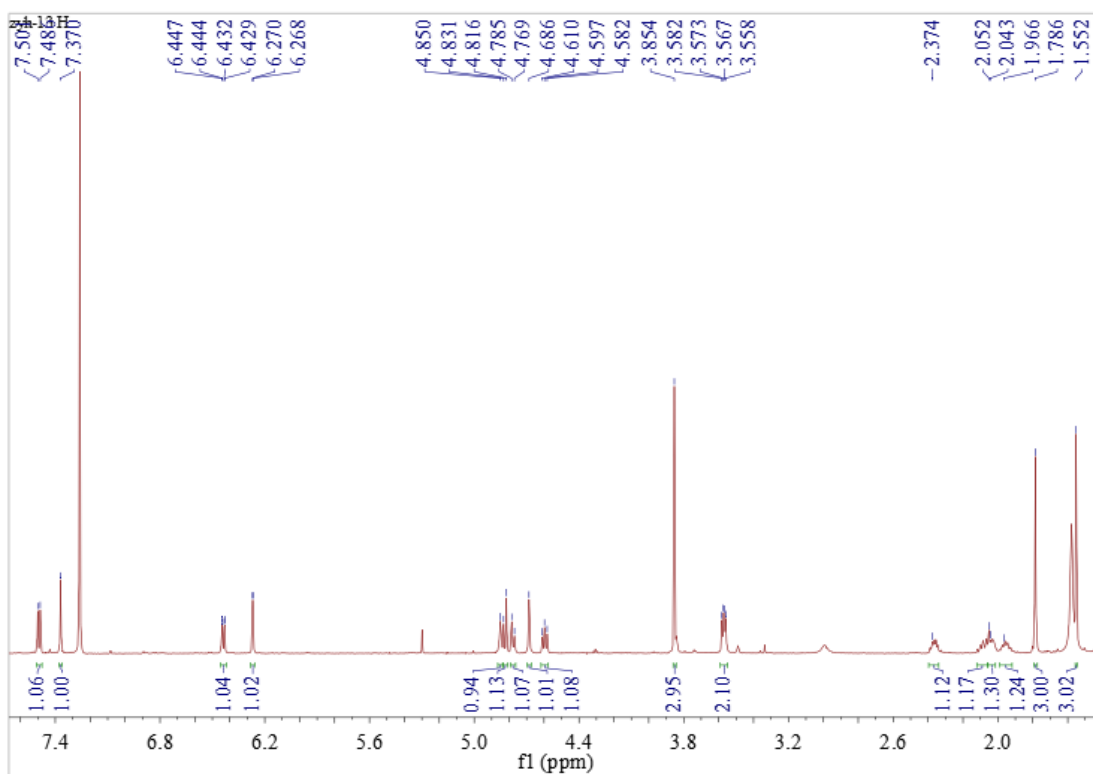

Figure S28. <sup>1</sup>H NMR (600 MHz, CDCl<sub>3</sub>) spectrum of compound 4.

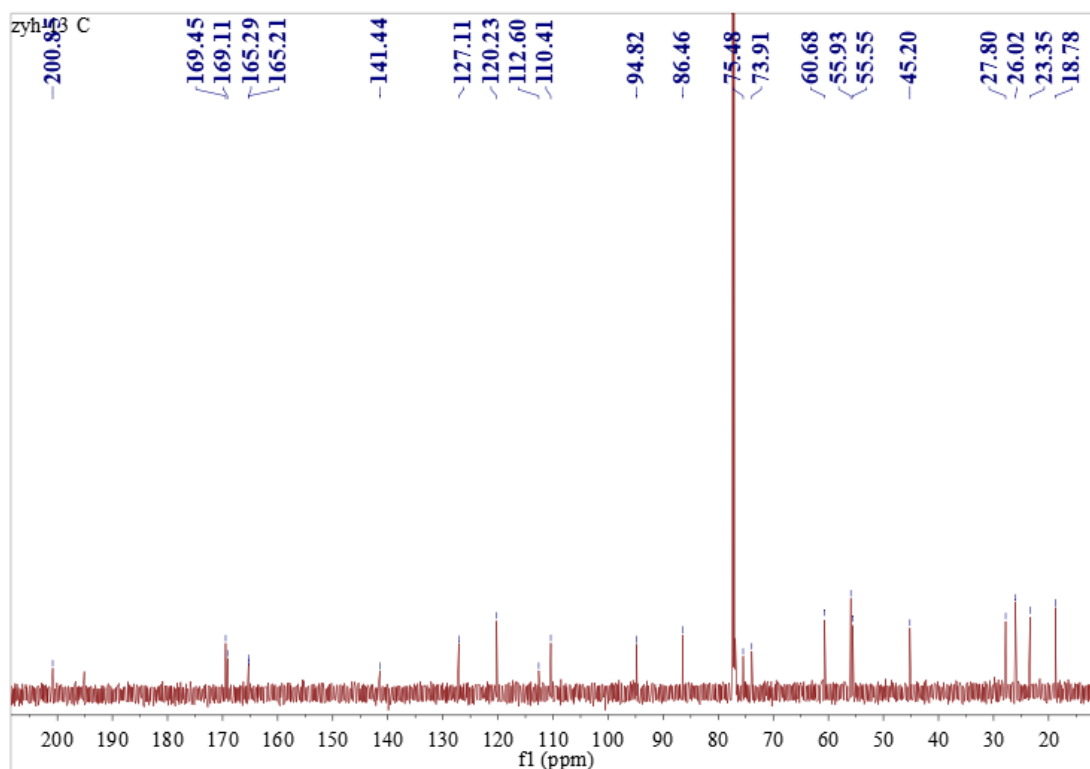

**Figure S29.**  $^{13}\text{C}$  NMR (150 MHz,  $\text{CDCl}_3$ ) spectrum of compound **4**.

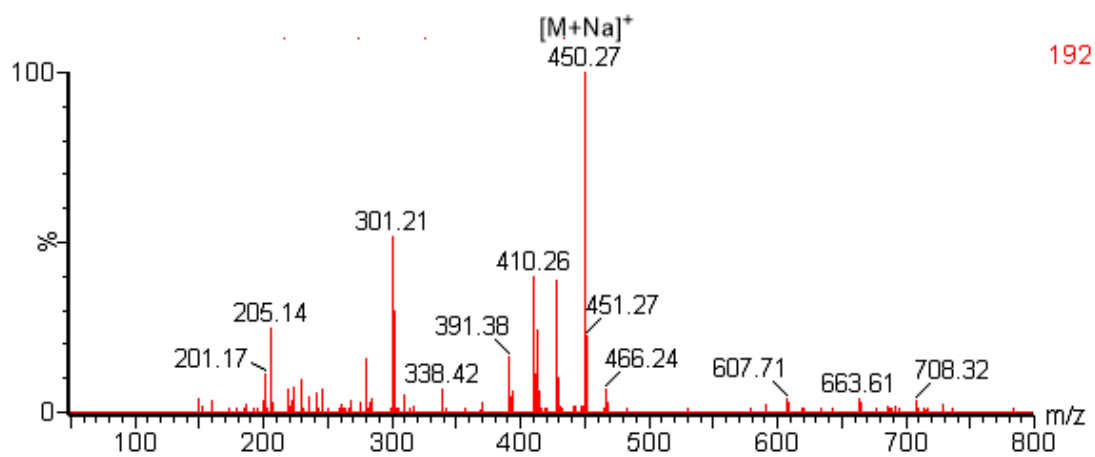

**Figure S30.** ESIMS spectrum of compound **4**.

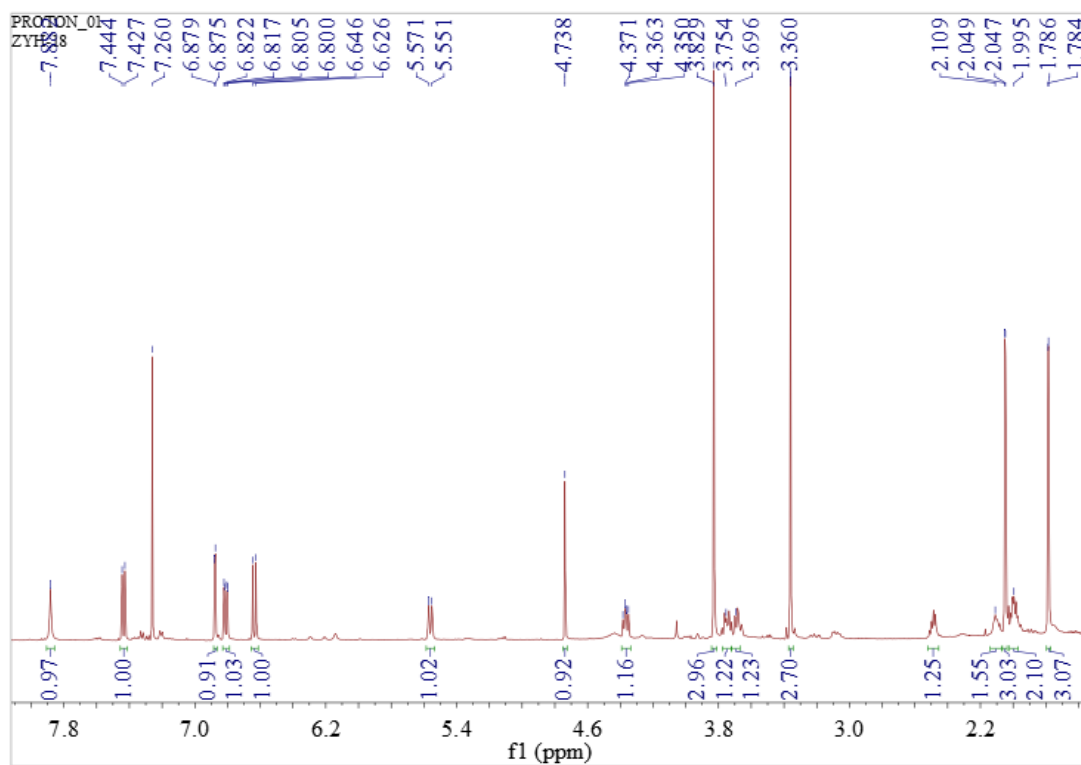

**Figure S31.**  $^1\text{H}$  NMR (500 MHz,  $\text{CDCl}_3$ ) spectrum of compound **5**.

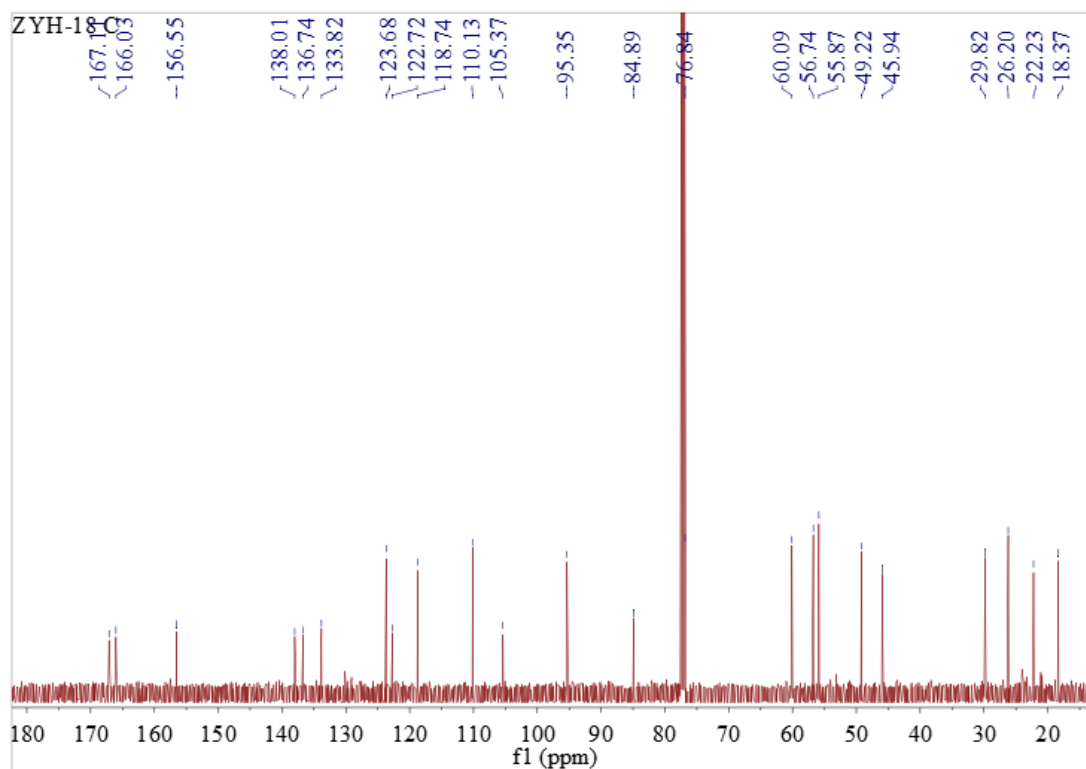

**Figure S32.**  $^{13}\text{C}$  NMR (125 MHz,  $\text{CDCl}_3$ ) spectrum of compound **5**.

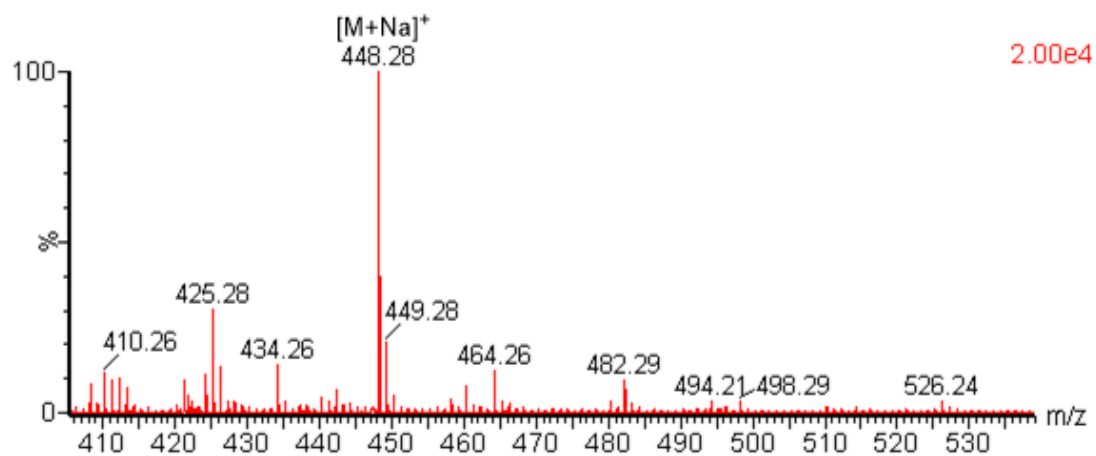

**Figure S33.** ESIMS spectrum of compound 5.

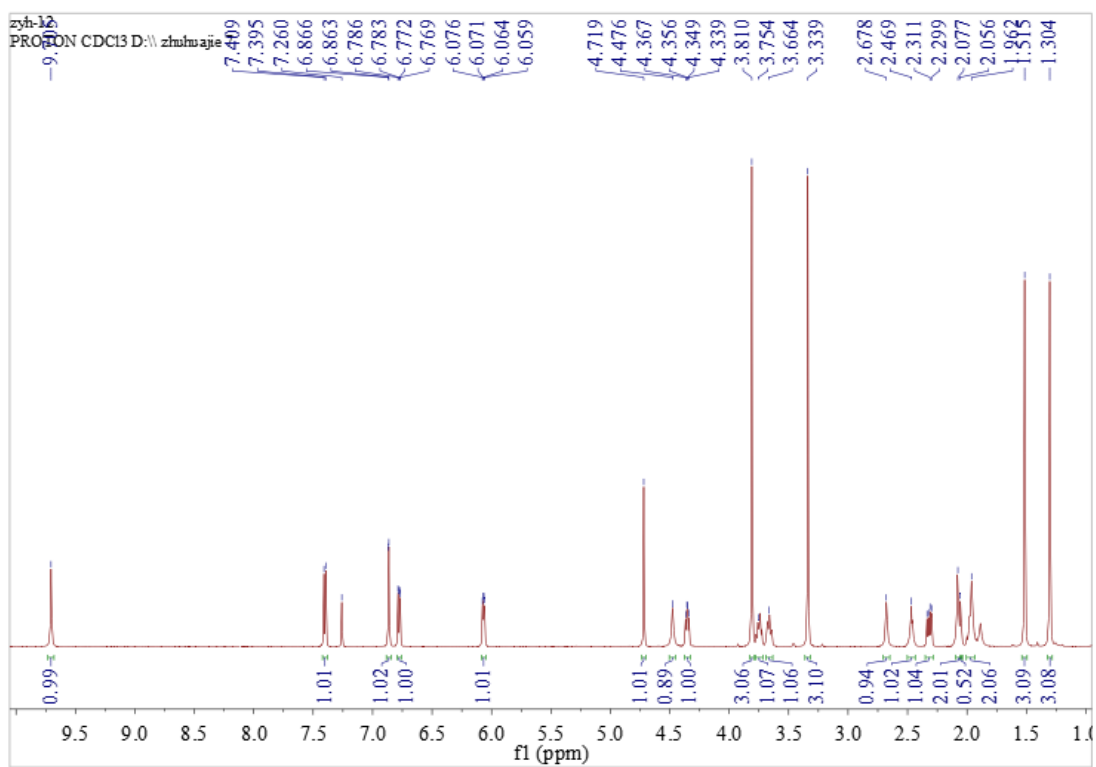

**Figure S34.**  $^1H$  NMR (600 MHz,  $CDCl_3$ ) spectrum of compound 6.

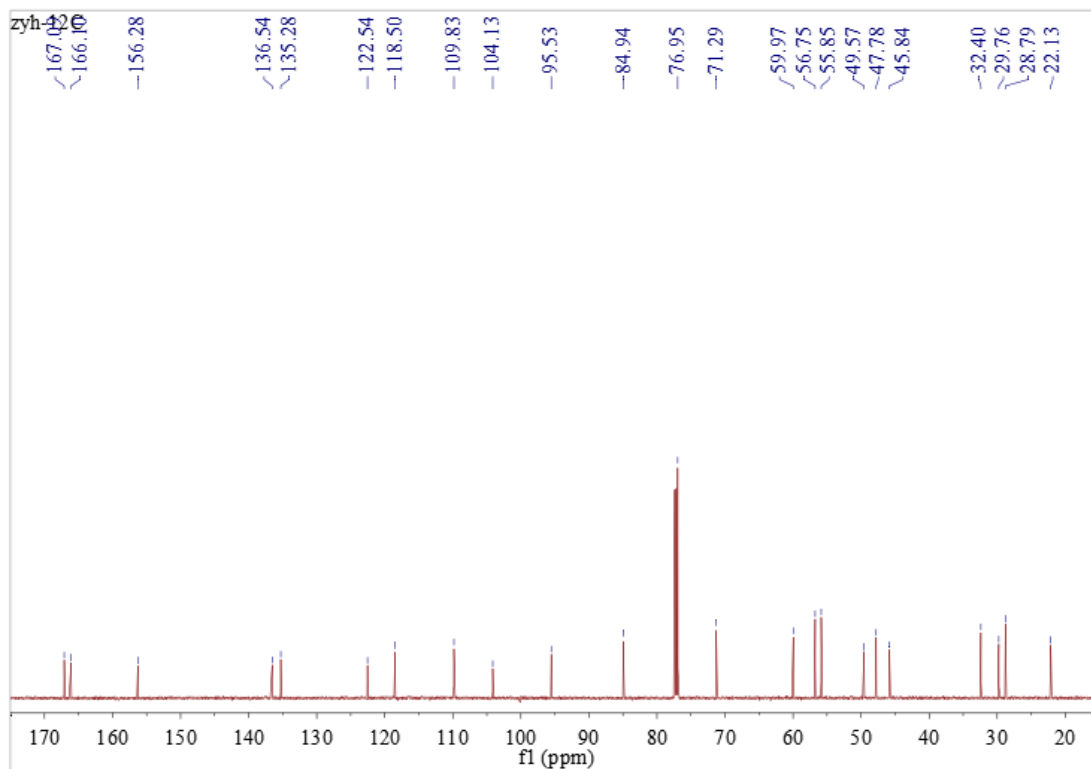

**Figure S35.**  $^{13}\text{C}$  NMR (150 MHz,  $\text{CDCl}_3$ ) spectrum of compound **6**.

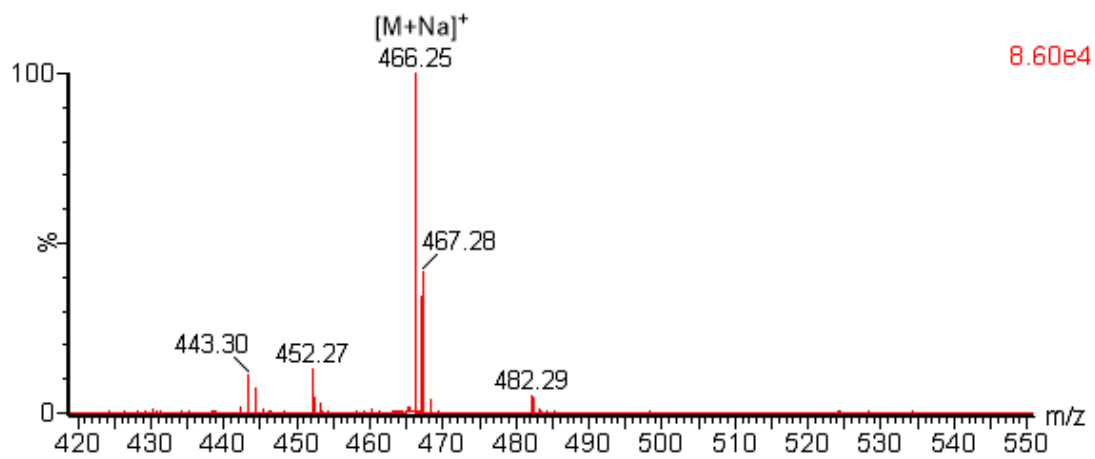

**Figure S36.** ESIMS spectrum of compound **6**.

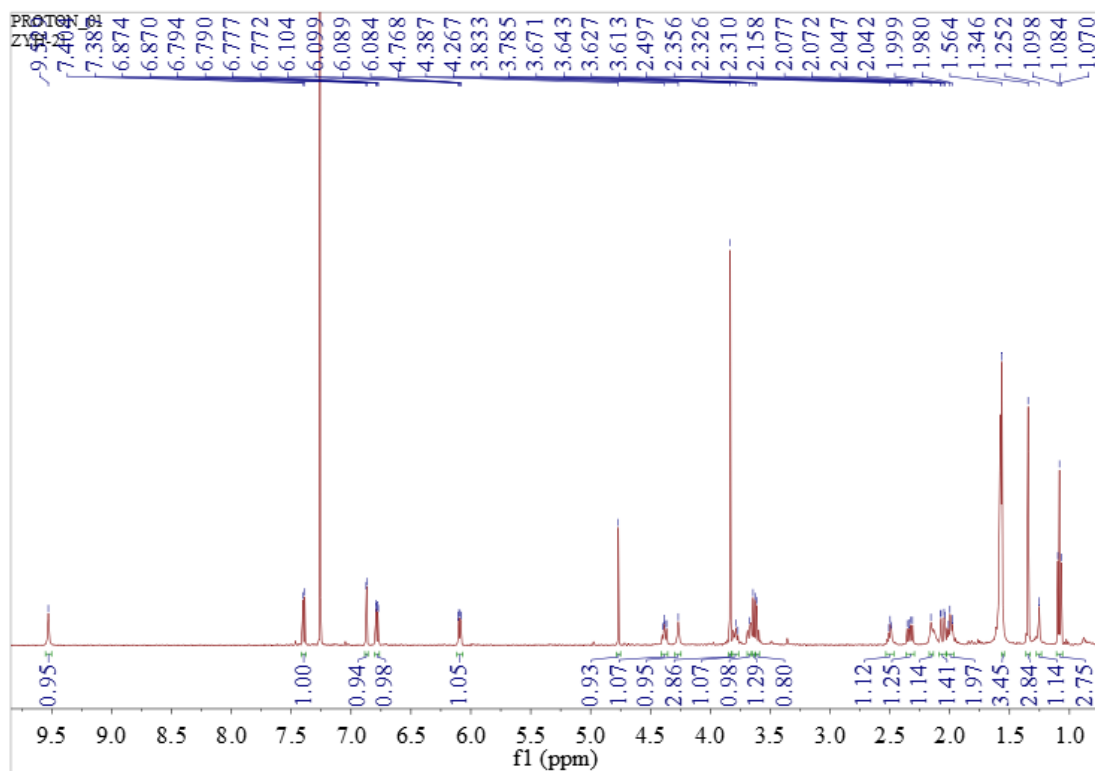

Figure S37.  $^1\text{H}$  NMR (500 MHz,  $\text{CDCl}_3$ ) spectrum of compound 7.

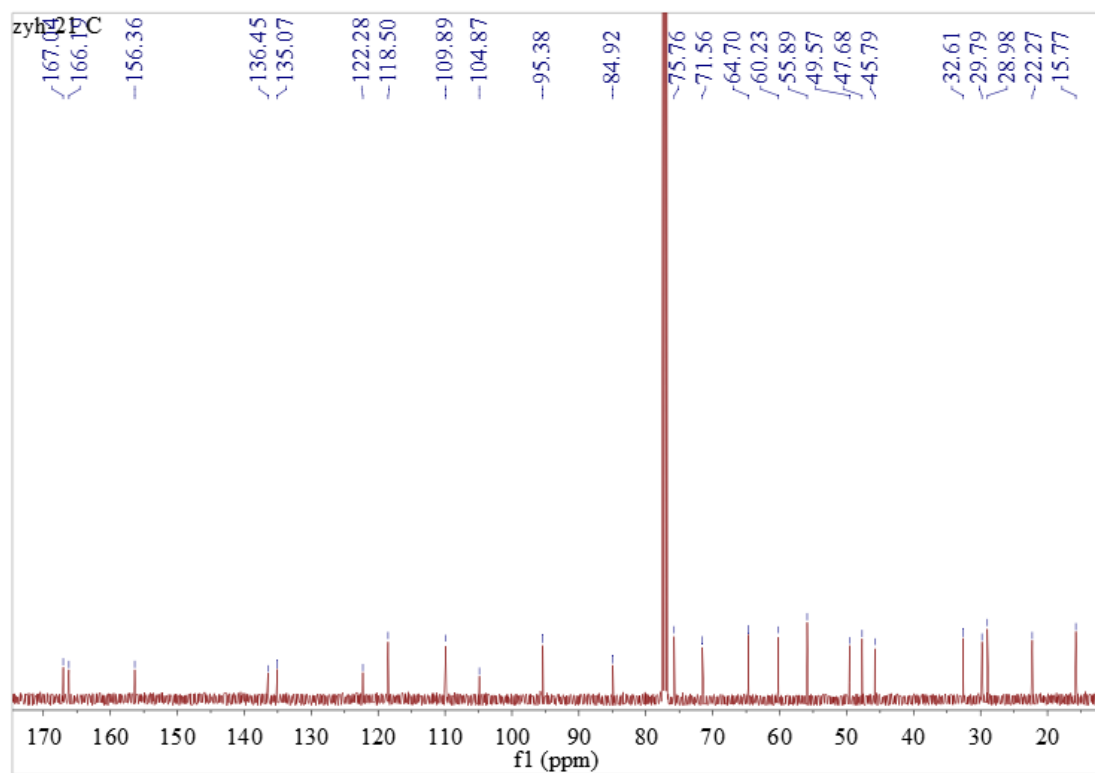

Figure S38.  $^{13}\text{C}$  NMR (125 MHz,  $\text{CDCl}_3$ ) spectrum of compound 7.

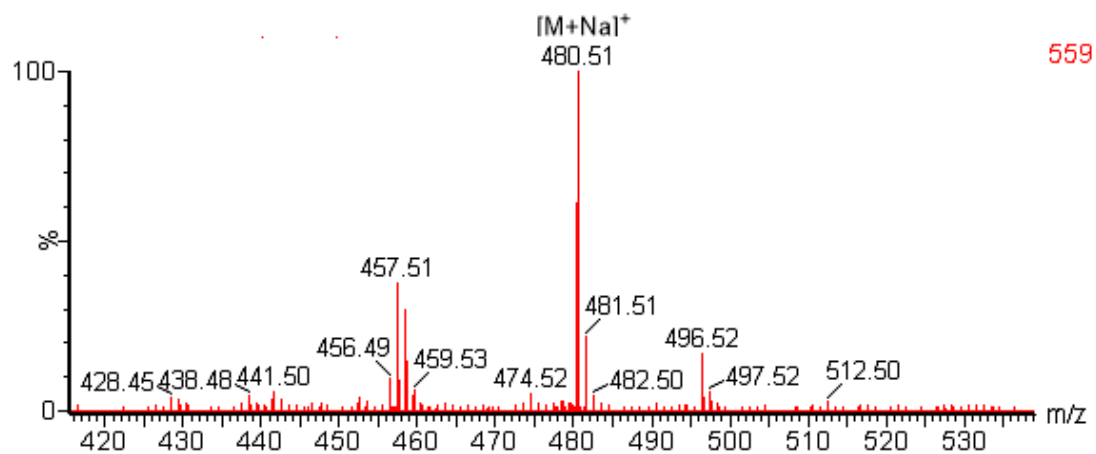

**Figure S39.** ESIMS spectrum of compound 7.

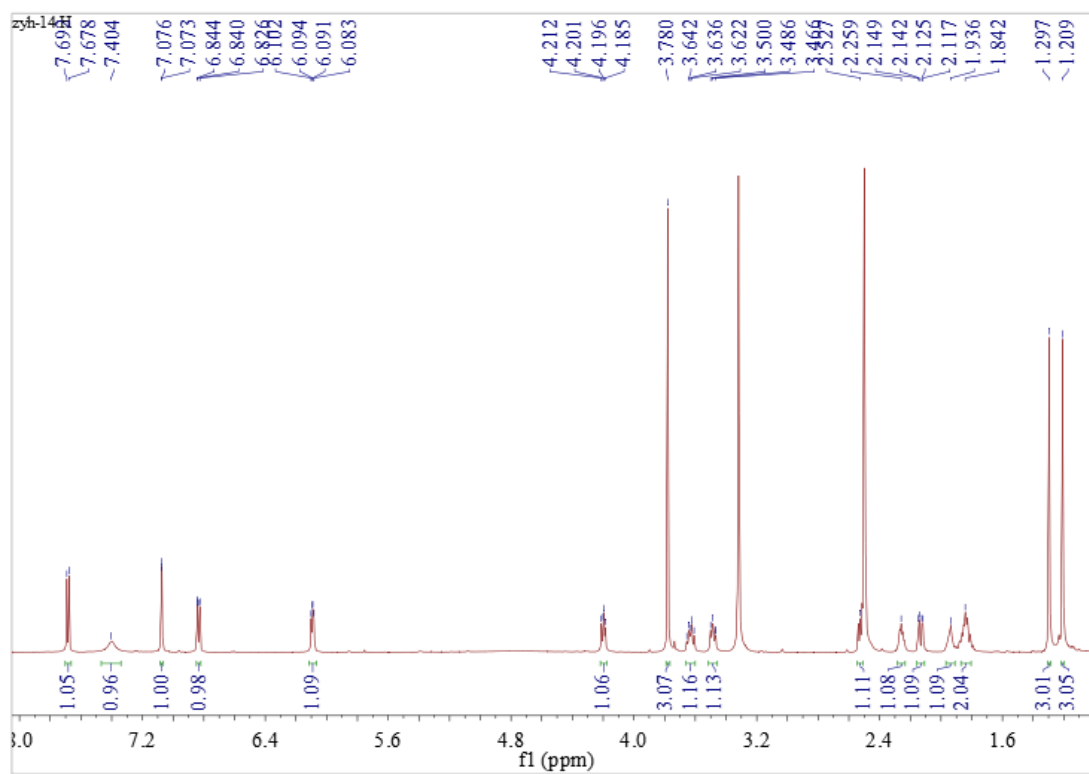

**Figure S40.**  $^1\text{H}$  NMR (600 MHz,  $\text{DMSO}-d_6$ ) spectrum of compound 8.

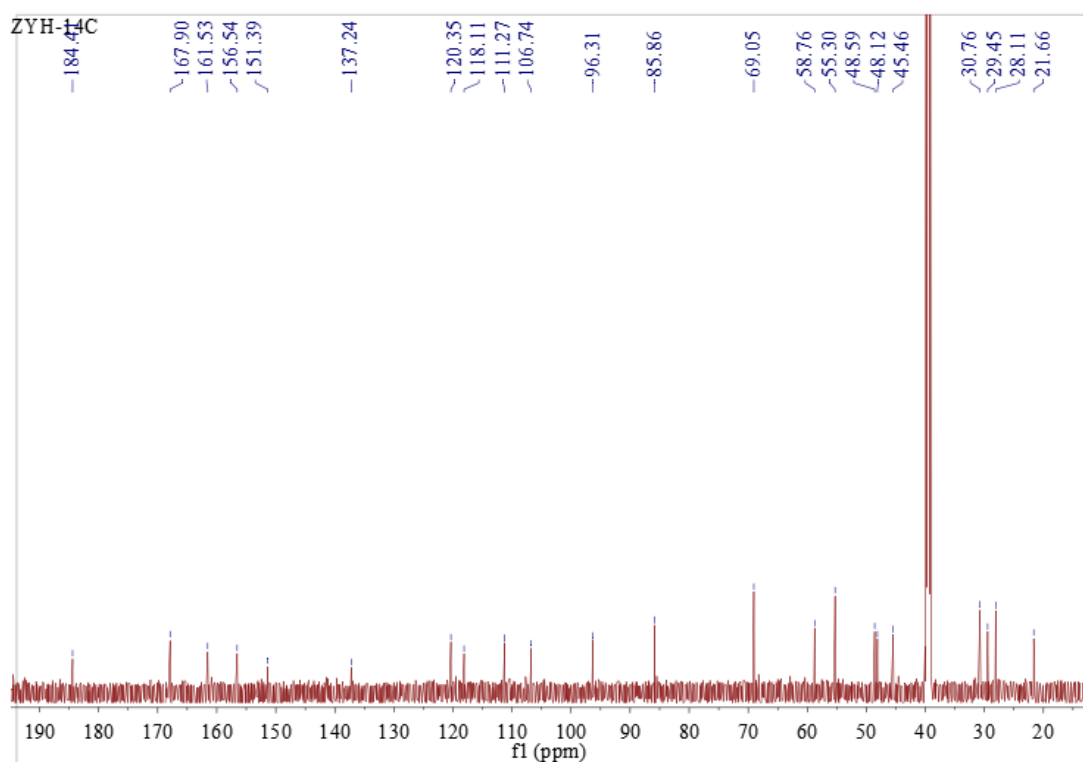

**Figure S41.**  $^{13}\text{C}$  NMR (150 MHz,  $\text{DMSO-}d_6$ ) spectrum of compound **8**.

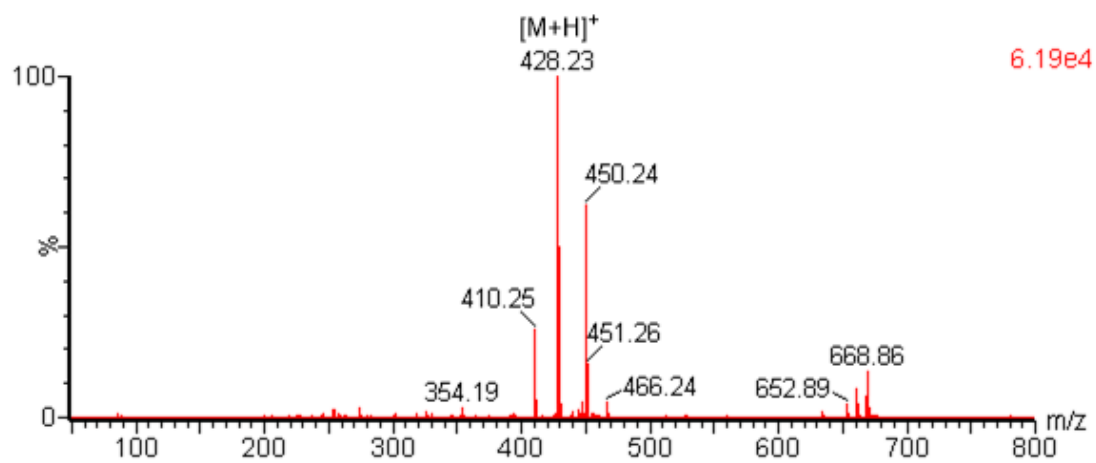

**Figure S42.** ESIMS spectrum of compound **8**.



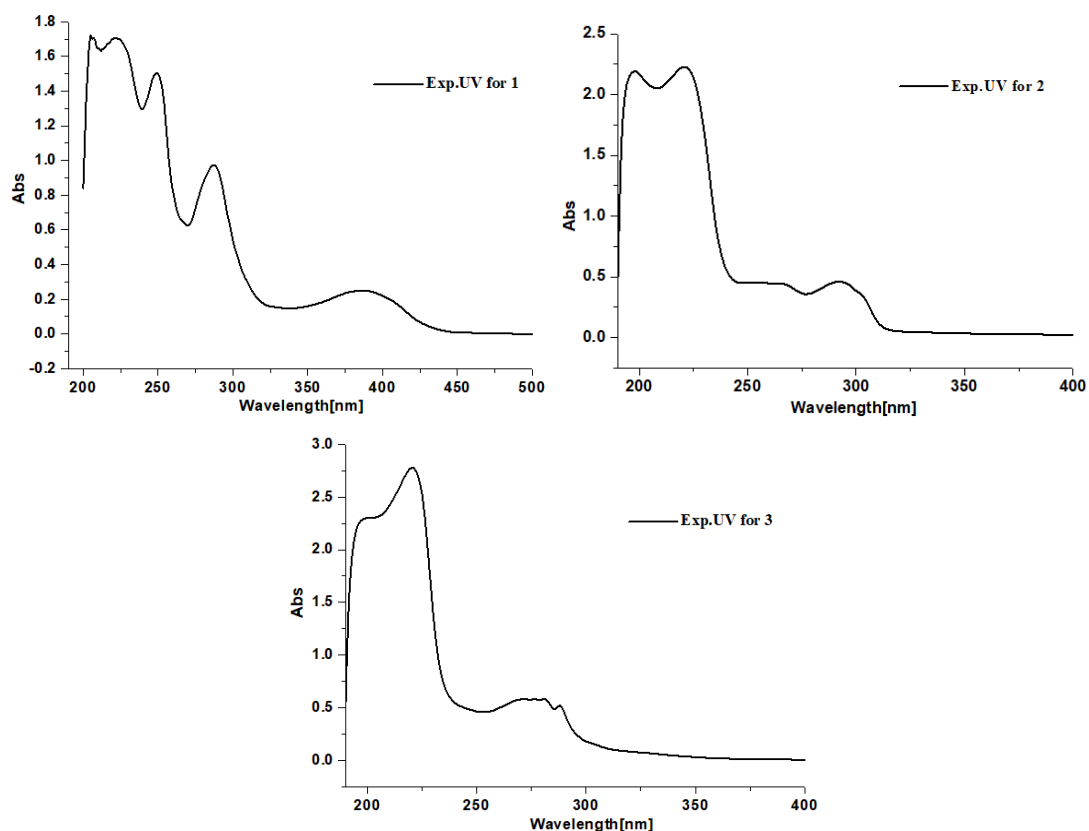

**Figure S43.** UV spectra of compounds 1–3.

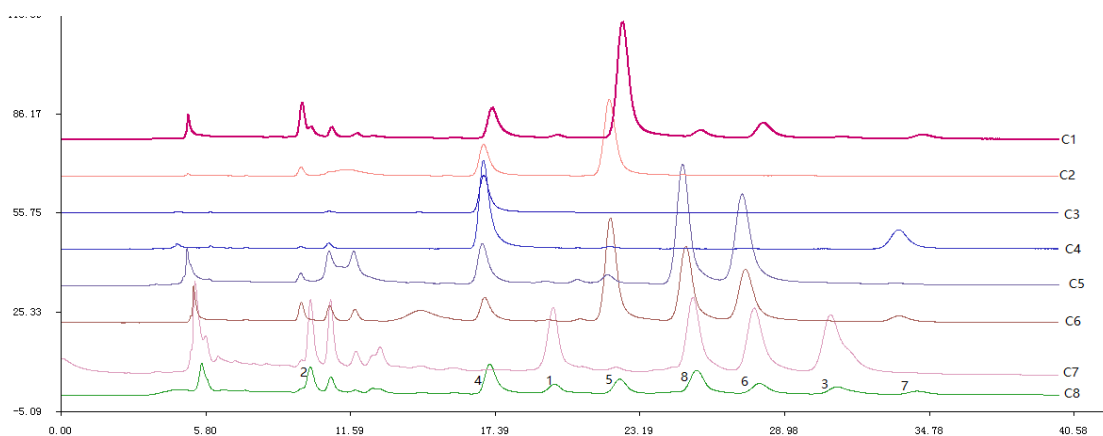

**Figure S44.** HPLC at 254 nm of the fermentation extracts from cultures in different media (C1-C8  $t_R$  0-5 min: 20% MeOH in H<sub>2</sub>O,  $t_R$  5-30 min: 20%-100% MeOH in H<sub>2</sub>O,  $t_R$  30-45 min: 100 % MeOH,  $v = 2$  mL/min).

**C1:** 80 mL water, 80 g rice, and 2.6 g MgCl<sub>2</sub> in 1 L Erlenmeyer flasks.

**C2:** 80 mL water and 80 g rice in 1 L Erlenmeyer flasks.

**C3:** 300 mL PDB in 1 L Erlenmeyer flasks.

**C4:** 300 mL PDB and 10 g sea salt in 1 L Erlenmeyer flasks.

**C5:** 80 mL water, 80 g rice, and 2.6 g NaCl in 1 L Erlenmeyer flasks.

**C6:** 80 mL PYG and 80 g rice in 1 L Erlenmeyer flasks.

**C7:** 80 mL water, 80 g rice, NaNO<sub>3</sub> 0.3 g, KH<sub>2</sub>PO<sub>4</sub> 0.1 g, MgSO<sub>4</sub>·7H<sub>2</sub>O 0.5 g, NaCl 0.05 g, FeSO<sub>4</sub> 0.01 g, sucrose 3.0 g in 1 L Erlenmeyer flasks.

**C8:** 80 mL water, 80 g rice, and 0.8 g MgCl<sub>2</sub> in 1 L Erlenmeyer flasks.

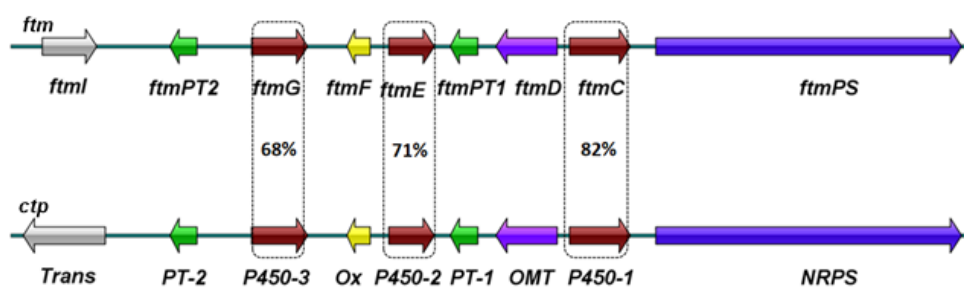

**Figure S45.** Comparison of our compounds BGC with fumitremorgin BGC

**Table S1.** Proposed NRPS biosynthetic gene clusters (NRPS-BGCs) predicted by fungiSMASH.

| Gene cluster number | Scaffold location              | Gene cluster type  |
|---------------------|--------------------------------|--------------------|
| cluster4            | c00083_11315_2 47752..98270    | Indole-t1PKS       |
| cluster6            | c00085_11318_8 22303..79507    | NRPS               |
| cluster13           | c00112_11377_4 722..42612      | NRPS               |
| cluster17           | c00135_11454_1 346838..402852  | NRPS               |
| cluster18           | c00143_11485_2 1..29500        | NRPS               |
| cluster32           | c00267_11710_1 259086..306783  | NRPS               |
| cluster33           | c00267_11710_1 613477..672287  | NRPS               |
| cluster35           | c00268_11712_3 35313..81905    | NRPS               |
| <b>cluster42</b>    | <b>c00304_11766_5 1..41450</b> | <b>Indole-NRPS</b> |
| cluster45           | c00311_11775_9 235173..278264  | NRPS               |
| cluster46           | c00311_11775_9 405829..461882  | NRPS               |
| cluster48           | c00330_11797_1 1..63658        | Indole-NRPS        |
| cluster50           | c00345_11815_5 461680..508014  | NRPS               |

**Table S2.** Proposed functions of genes in *ctp* gene clusters.

| Gene             | Protein size (aa) | Protein homolog | Identity/C overage (%) | Function                        | Accession no. |
|------------------|-------------------|-----------------|------------------------|---------------------------------|---------------|
| <i>ctpNRPS</i>   | 2234              | FtmA            | 67/99                  | Nonribosomal peptide synthetase | BAH23995.1    |
| <i>ctpP450-1</i> | 316               | FtmC            | 82/99                  | Cytochrome P450                 | BAH23996.1    |
| <i>ctpOMT</i>    | 410               | FtmD            | 81/83                  | O-methyltransferase             | BAH23997.1    |
| <i>ctpPT-1</i>   | 462               | FtmB            | 77/100                 | prenyltransferase               | BAH23998.1    |
| <i>ctpP450-2</i> | 533               | FtmE            | 71/98                  | Cytochrome P450                 | BAH23999.1    |
| <i>ctpOx</i>     | 288               | FtmF            | 77/99                  | Alpha-ketoglutarate dioxygenase | BAH24000.1    |
| <i>ctpP450-3</i> | 503               | FtmG            | 68/98                  | Cytochrome P450                 | BAH24001.1    |
| <i>ctpPT-2</i>   | 393               | FtmH            | 67/100                 | prenyltransferase               | BAH24002.1    |
| <i>ctpPT-MFS</i> | 581               | --              | 100/100                | putative MFS toxin efflux pump  | OOQ91430.1    |

**Table S3.** The coordinate for the lowest-energy conformer [(2*S*,8*S*,9*R*,12*R*,18*S*)-1] in ECD calculation.

|   | Coordinates (Angstroms) |             |             |
|---|-------------------------|-------------|-------------|
|   | X                       | Y           | Z           |
| C | 5.24025400              | -0.60470700 | -0.71747400 |
| C | 5.46623100              | 0.23255200  | 0.39856600  |
| C | 4.39484400              | 0.61339000  | 1.19870500  |
| C | 3.11072300              | 0.16928000  | 0.88323300  |
| C | 2.90216700              | -0.68341900 | -0.21855900 |
| C | 3.95447100              | -1.07478700 | -1.03439800 |
| C | 1.82286700              | 0.42835200  | 1.52043500  |
| C | 0.75066800              | -0.23740000 | 0.60879800  |
| N | 1.56089200              | -1.08036300 | -0.29206400 |
| C | -0.14398000             | 0.78046600  | -0.17342800 |
| N | -1.36550500             | -0.03644300 | -0.40998700 |
| C | -1.46462300             | -1.22014700 | 0.40601900  |
| C | -0.26193100             | -1.12347800 | 1.38074900  |
| C | -2.38821900             | 0.36463200  | -1.23374300 |
| C | -3.63358800             | -0.56551400 | -1.17720400 |
| N | -3.86199600             | -0.97745200 | 0.22106800  |
| C | -2.85331900             | -1.28641800 | 1.08088100  |
| C | -4.94042100             | 0.14986300  | -1.56757900 |
| C | -5.70025200             | 0.38172400  | -0.24775600 |
| C | -5.25419200             | -0.79143000 | 0.63720900  |
| O | -2.99966300             | -1.57921100 | 2.26006900  |
| O | -2.31536900             | 1.34462600  | -1.95787200 |
| O | -3.44741000             | -1.65901800 | -2.05424500 |
| O | 1.57258500              | 1.02109700  | 2.55427200  |
| C | -0.46043500             | 2.04561800  | 0.58051900  |
| C | -0.40947000             | 3.29940100  | 0.10526800  |
| C | -0.75444800             | 4.46184100  | 1.00521700  |
| C | -0.02841400             | 3.68996400  | -1.30063600 |
| O | -1.28719800             | -2.38379800 | -0.42379000 |
| O | 0.25751800              | -2.39957800 | 1.68375300  |
| O | 6.22025300              | -1.02135600 | -1.55689600 |
| C | 7.56084500              | -0.60773700 | -1.31668000 |
| H | 6.46400800              | 0.58259800  | 0.63185400  |
| H | 4.54370100              | 1.26239000  | 2.05682100  |
| H | 3.82576400              | -1.72870700 | -1.89064200 |
| H | 1.16524800              | -1.28621800 | -1.20352600 |
| H | 0.32113500              | 1.00971900  | -1.13420700 |
| H | -0.56533600             | -0.63848900 | 2.31113800  |
| H | -5.48865300             | -0.53310800 | -2.22312800 |
| H | -4.72662900             | 1.06607000  | -2.12045500 |
| H | -5.39180400             | 1.32771400  | 0.21207700  |
| H | -6.78479100             | 0.41402500  | -0.38769100 |
| H | -5.83823700             | -1.69836700 | 0.43197500  |
| H | -5.28744900             | -0.59698200 | 1.71118100  |
| H | -2.68889700             | -2.17699700 | -1.71780600 |
| H | -0.75531100             | 1.89982900  | 1.61721100  |
| H | -0.99668200             | 4.13780100  | 2.02156800  |
| H | 0.08232700              | 5.17140000  | 1.06402800  |
| H | -1.61143000             | 5.02203800  | 0.60666400  |
| H | 0.08567700              | 2.84160400  | -1.97632200 |
| H | -0.80280800             | 4.33824300  | -1.72976400 |
| H | 0.90478400              | 4.27021800  | -1.29959600 |
| H | -0.99040500             | -3.08023300 | 0.19778700  |
| H | 1.00271500              | -2.51775200 | 1.05809200  |
| H | 8.15595300              | -1.06622800 | -2.10773300 |
| H | 7.65948800              | 0.48323500  | -1.37253300 |
| H | 7.91948800              | -0.95835700 | -0.34127800 |

**Table S4.** The coordinate for the lowest-energy conformer [(8*S*,9*S*,12*R*,18*S*)-2] in ECD calculation.

|   | Coordinates (Angstroms) |             |             |
|---|-------------------------|-------------|-------------|
|   | X                       | Y           | Z           |
| C | 5.32903200              | -0.90956900 | -0.06328100 |
| C | 4.62278400              | 0.26108900  | -0.32249500 |
| C | 3.22765700              | 0.19832700  | -0.22858300 |
| C | 2.52575400              | -0.98736700 | 0.10040900  |
| C | 3.27592500              | -2.14744700 | 0.35952200  |
| C | 4.65519500              | -2.10273900 | 0.27903800  |
| N | 2.28949100              | 1.19640400  | -0.41709300 |
| C | 1.02848900              | 0.68141500  | -0.20758300 |
| C | 1.12176900              | -0.65113200 | 0.09662900  |
| C | -0.21782400             | 1.51781600  | -0.26444600 |
| N | -1.37005700             | 0.61399100  | 0.00717000  |
| C | -1.17879100             | -0.46407100 | 0.97583300  |
| C | -0.08751200             | -1.44788600 | 0.46331400  |
| C | -2.46535200             | 0.73610500  | -0.80759600 |
| C | -3.45398000             | -0.44188800 | -0.81346100 |
| N | -3.51812900             | -1.11610500 | 0.48429000  |
| C | -2.49140800             | -1.20846000 | 1.33427300  |
| C | -4.91144800             | -0.05574400 | -1.05626900 |
| C | -5.68545800             | -1.24319500 | -0.45787300 |
| C | -4.85627000             | -1.66635400 | 0.76947000  |
| C | -0.15527700             | 2.71283000  | 0.66217300  |
| C | -0.29565300             | 4.00087100  | 0.31923900  |
| C | -0.17783600             | 5.07820900  | 1.36965400  |
| C | -0.58924500             | 4.51509200  | -1.06732600 |
| O | -0.67728400             | -2.18767600 | -0.62768700 |
| O | -0.72279100             | 0.11050500  | 2.18526600  |
| O | -2.53143000             | -1.79170900 | 2.41459600  |
| O | -2.61967300             | 1.66621900  | -1.58041900 |
| O | -3.06569200             | -1.33789900 | -1.83983200 |
| O | 6.69279600              | -1.01144600 | -0.11271700 |
| C | 7.44554800              | 0.13817500  | -0.45683700 |
| C | 0.11466000              | -3.26230200 | -1.11993900 |
| H | 5.11930500              | 1.18757300  | -0.58291100 |
| H | 2.78731400              | -3.07863200 | 0.62761300  |
| H | 5.25515700              | -2.98369900 | 0.47692500  |
| H | 2.48977700              | 2.17387800  | -0.55576100 |
| H | -0.37366800             | 1.85894300  | -1.28811800 |
| H | 0.12825700              | -2.15710300 | 1.27156100  |
| H | -5.09427300             | 0.10419600  | -2.11701300 |
| H | -5.13396300             | 0.87400900  | -0.52664400 |
| H | -6.70864300             | -0.98047200 | -0.18417200 |
| H | -5.73153800             | -2.05890600 | -1.18121000 |
| H | -4.80338200             | -2.74761300 | 0.90676700  |
| H | -5.22289000             | -1.23191500 | 1.70340300  |
| H | 0.03102300              | 2.45928900  | 1.70105200  |
| H | 0.05899700              | 4.67024600  | 2.35394800  |
| H | 0.60027100              | 5.80395600  | 1.10461100  |
| H | -1.11258200             | 5.64494600  | 1.45183500  |
| H | -0.82334300             | 3.73364100  | -1.78770800 |
| H | -1.44976500             | 5.19219900  | -1.03933300 |
| H | 0.25217900              | 5.10588200  | -1.44996900 |
| H | -1.06777000             | -0.45468600 | 2.89801200  |
| H | -2.19238800             | -1.70259600 | -1.60225500 |
| H | 8.48910500              | -0.17155300 | -0.44232400 |
| H | 7.19053000              | 0.49942400  | -1.45945200 |
| H | 7.29947200              | 0.94603600  | 0.26898700  |
| H | 1.04559100              | -2.90007900 | -1.56424300 |
| H | 0.34346300              | -3.97406200 | -0.31797600 |
| H | -0.47734200             | -3.76754000 | -1.88304400 |

**Table S5. Antibacterial activities data of compounds 1–8**

|                           | Compd. MIC ( $\mu$ M) |     |     |     |     |     |     |     | CIP   |
|---------------------------|-----------------------|-----|-----|-----|-----|-----|-----|-----|-------|
|                           | 1                     | 2   | 3   | 4   | 5   | 6   | 7   | 8   |       |
| <i>B. megaterium</i>      | >25                   | >25 | >25 | >25 | >25 | >25 | >25 | >25 | 0.625 |
| <i>B. subtilis</i>        | >25                   | >25 | >25 | >25 | >25 | >25 | >25 | >25 | 0.039 |
| <i>E. coli</i>            | >25                   | >25 | >25 | >25 | >25 | >25 | >25 | >25 | 0.156 |
| <i>B. anthraci</i>        | >25                   | >25 | >25 | >25 | >25 | >25 | >25 | >25 | 0.078 |
| <i>B. cereus</i>          | >25                   | >25 | >25 | >25 | >25 | >25 | >25 | >25 | 0.313 |
| <i>B. paratyphosum B</i>  | >25                   | >25 | >25 | >25 | >25 | >25 | >25 | >25 | 0.078 |
| <i>E. aerogenes</i>       | >25                   | >25 | >25 | >25 | >25 | >25 | >25 | >25 | 0.002 |
| <i>M. lysodeikticus</i>   | >25                   | >25 | >25 | >25 | >25 | >25 | >25 | >25 | 0.078 |
| <i>M. luteus</i>          | >25                   | >25 | >25 | >25 | >25 | >25 | >25 | >25 | 0.02  |
| <i>P. vulgaris</i>        | >25                   | >25 | >25 | >25 | >25 | >25 | >25 | >25 | 0.156 |
| <i>S. dysenteriae</i>     | >25                   | >25 | >25 | >25 | >25 | >25 | >25 | >25 | 0.039 |
| <i>P. aeruginosa</i>      | >25                   | >25 | >25 | >25 | >25 | >25 | >25 | >25 | 0.005 |
| <i>S. aureus</i>          | >25                   | >25 | >25 | >25 | >25 | >25 | >25 | >25 | 0.039 |
| <i>S. typhi</i>           | >25                   | >25 | >25 | >25 | >25 | >25 | >25 | >25 | 0.078 |
| <i>V. anguillarum</i>     | >25                   | >25 | >25 | >25 | >25 | >25 | >25 | >25 | 0.039 |
| <i>V. parahemolyticus</i> | >25                   | >25 | >25 | >25 | >25 | >25 | >25 | >25 | 0.156 |

**Table S6. Cytotoxic activity data of compounds 1–8**

| Compd.     | IC <sub>50</sub> (μM) |         |       |
|------------|-----------------------|---------|-------|
|            | HL-60                 | HCT-116 | MCF-7 |
| <b>1</b>   | 6.0                   | >10     | >10   |
| <b>2</b>   | >10                   | >10     | 7.6   |
| <b>3</b>   | >10                   | >10     | 10.8  |
| <b>4</b>   | 7.9                   | >10     | >10   |
| <b>5</b>   | >10                   | >10     | 5.1   |
| <b>6</b>   | >10                   | >10     | >10   |
| <b>7</b>   | >10                   | >10     | >10   |
| <b>8</b>   | >10                   | >10     | >10   |
| <b>DDP</b> | 1.14                  | 3.36    | 2.59  |
